***Drosophila* DNA/RNA methyltransferase contributes to robust host defense in ageing animals by regulating sphingolipid metabolism**

Varada Abhyankar<sup>1</sup>, Bhagyashree Kaduskar<sup>2</sup>, Siddhesh S. Kamat<sup>2</sup>, Deepti Deobagkar<sup>1,3,\*</sup>, Girish Ratnaparkhi<sup>2,\*</sup>

**Running Title:** Mt2 regulates lipid homeostasis in an age dependent manner.

<sup>1</sup>Department of Zoology, Savitribai Phule Pune University, Pune 411007, INDIA.

<sup>2</sup>Department of Biology, Indian Institute of Science Education & Research, Pune 411008, INDIA.

<sup>3</sup>ISRO Chair Professor, Savitribai Phule Pune University, Pune 411007, INDIA.

\*Authors for Correspondence: [deepti.deobagkar@gmail.com](mailto:deepti.deobagkar@gmail.com), [girish@iiserpune.ac.in](mailto:girish@iiserpune.ac.in)

**Key Words:** DNA methyltransferase, *Drosophila*, Lipid homeostasis, hemocyte, innate immunity, ceramide, signaling, sphingosine-1-phosphate (S1P).

1 **ABSTRACT**

2 *Drosophila* methyltransferase (*Mt2*) has been implicated in methylation of both DNA and  
3 tRNA. In this study, we demonstrate that loss of *Mt2* activity leads to an age dependent decline of  
4 immune function in the adult fly. A newly eclosed adult has mild immune defects that exacerbate  
5 in a fifteen-day old *Mt2*<sup>-/-</sup> fly. The age dependent effects appear to be systemic, including  
6 disturbances in lipid metabolism, changes in cell shape of hemocytes and significant fold changes  
7 in levels of transcripts related to host defense. Lipid imbalance, as measured by quantitative  
8 lipidomics, correlates with immune dysfunction with high levels of immunomodulatory lipids,  
9 sphingosine-1-phosphate (S1P) and ceramides, along with low levels of storage lipids. Activity  
10 assays on fly lysates confirm the age dependent increase in S1P and concomitant reduction of S1P  
11 lyase activity. We hypothesize that *Mt2* functions to regulate genetic loci such as S1P lyase and  
12 this regulation is essential for robust host defense as the animal ages. Our study uncovers novel  
13 links between age dependent *Mt2* function, innate immune response and lipid homeostasis.

14

15 **KEYWORDS**

16 Methyltransferase, S1P, hemocyte shape, lipid homeostasis, age dependence, robust immune response

17

18

## 19 INTRODUCTION

20 Innate immunity (Janeway and Medzhitov, 2002) is an evolutionary conserved host  
21 defense mechanism present throughout the plant and animal kingdoms. It is the predominant form  
22 of defense against pathogens. Invertebrates lack the adaptive immune system and are thus an  
23 excellent model to study innate defense mechanisms in isolation. The fruit fly, *Drosophila*  
24 *melanogaster*, responds to microbial infections by mounting a defense (Akira et al., 2006;  
25 Anderson, 2000; Buchon et al., 2014; Ferrandon et al., 2007; Iwasaki and Medzhitov, 2010;  
26 Lemaitre and Hoffmann, 2007; Ligoxygakis, 2013; Uvell and Engstrom, 2007) against the  
27 invading organisms. The first line of defense is the external cuticle and epithelial barriers. Once  
28 the pathogen breaches these barriers and reaches the hemocoel, they encounter systemic defenses,  
29 both humoral and cellular. The humoral response encompasses the up-regulation of the defense  
30 genes and antimicrobial peptides (AMPs) from the fat body of *Drosophila*, melanization and the  
31 release of reactive oxygen species, while hemocytes (Agaisse et al., 2003; Williams, 2007) lead  
32 the cellular response, by efficiently phagocytosing and encapsulating microorganisms. Defense  
33 genes thus encode proteins/RNA that function to counteract the effect of the invader and repair the  
34 damage caused. The regulation and thereby expression of defense genes is controlled by a number  
35 of well-characterized signal transduction pathways like the Toll signaling pathway, Immune-  
36 deficient (IMD) pathway, c-Jun N-terminal kinases (JNK) and the JAK-STAT pathways (Agaisse  
37 et al., 2003; Delaney et al., 2006; Govind and Nehm, 2004; Kounatidis and Ligoxygakis, 2012;  
38 Lemaitre and Hoffmann, 2007; Lemaitre et al., 1996; Matova and Anderson, 2010; Schneider,  
39 2007; Silverman et al., 2003). Extracellular ligands and/or cell surface receptors sense signatures  
40 of systemic microorganisms and this signal is transduced via the aforementioned transduction  
41 pathways to activate the *Drosophila* NF $\kappa$ B's Dorsal, Dif and Relish (Brennan and Anderson, 2004;

42 Govind, 1999; Hetru and Hoffmann, 2009; Ip et al., 1993; Kounatidis et al., 2017; Lemaitre et al.,  
43 1995; Tanji and Ip, 2005).

44 The immune response in *Drosophila* shows complex age-dependent phenotypes (Clark et  
45 al., 2014; Zerofsky et al., 2005). In terms of the cellular response, phagocytic activity declines by  
46 30% in one month old flies and this correlates with a decline in number of hemocytes (Horn et al.,  
47 2014; Mackenzie et al., 2011). Levels of expression of many defense genes vary greatly with age  
48 (Felix et al., 2012; Zerofsky et al., 2005), suggesting age dependent regulation of the immune  
49 response. The overall picture is complex and suggests compensatory mechanisms to deal with  
50 infection while ageing. Longevity has also been linked to immune function with many critical  
51 signaling networks that regulate longevity such as Insulin-IGF like (IIL) and TOR pathways  
52 (Grewal, 2009; Johnson et al., 2013; Kapahi et al., 2017; Partridge et al., 2011) shown to  
53 communicate with the central immune pathways for robust regulation of host defense (DeVeale et  
54 al., 2004; Kounatidis et al., 2017; Unckless et al., 2015).

55 In this study, we characterize the immune response in flies with perturbation in activity of  
56 *Drosophila DnMt2* (called *Mt2* henceforth), a cryptic DNA/RNA methyltransferase (MT).  
57 Vertebrates have multiple DNA MTs, classified as *DnMt1*, *Mt2*, *DnMt3a*, *DnMT3b*, based on their  
58 activity and structural features (Basu et al., 2016; Okano et al., 1998). In contrast, *Mt2* is the only  
59 MT identified in *Drosophila* (Tang et al., 2003). Originally, *Mt2* was characterized as a DNA-MT,  
60 but recent research suggests that *Mt2* might function primarily as a RNA-MT (Goll et al., 2006;  
61 Schaefer et al., 2010), with methylation enhancing tRNA stability. *Mt2* null flies (*Mt2*<sup>-/-</sup>) do not  
62 show overt developmental abnormalities and their lifespan is near normal under non-stressed  
63 conditions. Under stress (Becker et al., 2012; Schaefer et al., 2010; Thiagarajan et al., 2011), *Mt2*

64  $^{-/-}$  flies show a shorter lifespan (Lin et al., 2005). Flies grown in overcrowded conditions develop  
65 melanotic spots (Durdevic et al., 2013), suggesting disturbances in immune function. Infection  
66 studies also suggest that Mt2 plays an important role in acute immune response to *Drosophila C*  
67 virus (DCV) by binding to and possibly methylating viral RNA (Durdevic et al., 2013).

68         Here, we demonstrate that *Mt2*<sup>-/-</sup> flies show an age dependent immune decline. The ability  
69 of adult flies to clear bacteria decreases dramatically by the fifteenth day post eclosion. Adult  
70 hemocytes are sickle-shaped with numbers in excess of that for a wild type animal of the same  
71 age. The age dependent effects are correlated with perturbations in lipid homeostasis, suggesting  
72 that the decline may be a direct response to changes in critical lipid molecules involved in cellular  
73 homeostasis. We hypothesize that Mt2 regulates enzymes involved in lipid homeostasis and this  
74 function is essential for supporting a robust immune response as the animal ages.

75

76

## 77 RESULTS

78 **Mt2-Null flies show reduction in life-span after bacterial infection:** Earlier reports on *Mt2*<sup>-/-</sup>  
79 flies indicated that these flies show a shortened lifespan (Lin et al., 2005), are sensitive to stress  
80 (Schaefer et al., 2010) and are susceptible to viral infection (Durdevic et al., 2013). In our study,  
81 we first confirmed that *Mt2*<sup>-/-</sup> flies had shorter lifespan (Fig. 1A) and then tested if *E. coli*. infection  
82 had an effect on *Mt2*<sup>-/-</sup> lifespan. *Mt2*<sup>+/+</sup>, *Mt2*<sup>-/-</sup> and *Mt2*-(*Transgenic Rescue*)*TG* lines (genotypes  
83 as described in Materials & Methods) were either infected with *E. coli* or mock infected with sterile  
84 1X PBS. Infection of *Mt2*<sup>-/-</sup> flies, when compared to *Mt2*<sup>+/+</sup>, had an increased rate of lethality. In  
85 contrast, *Mt2*-*TG* animals showed a near normal lifespan for both mock and infection experiments,  
86 suggesting a role for Mt2 in host defense against gram negative bacteria. In order to get a more  
87 detailed picture for roles for Mt2 in the innate immune response, as described in following sections,  
88 we tested the functionality of both the cellular and humoral arms of the immune response by  
89 bacterial clearance assays as well by measuring change in transcript levels of defense genes in  
90 *Mt2*<sup>-/-</sup> flies before and after infection.

91 **Mt2-Null flies show age dependent impairment in bacterial clearance:** We infected 2 day old  
92 adult *Mt2*<sup>+/+</sup>, *Mt2*<sup>-/-</sup> and *Mt2*-*TG* with a saturated, Ampicillin (Amp) resistant culture of *E. coli*.  
93 Six hours post infection, the animals were crushed and processed, as described in Materials &  
94 Methods, to measure the decrease in *E. coli* numbers as a consequence of clearance by a robust  
95 immune response. The *Mt2*<sup>-/-</sup> flies were an order of magnitude less efficient (Fig. 1B, compare 6  
96 Hour *Mt2*<sup>+/+</sup> with *Mt2*<sup>-/-</sup>) in clearing the infection as against the wild type or the rescue line (Fig.  
97 1B). 2 day old *Mt2*<sup>-/-</sup> flies thus, are impaired in their ability to clear bacteria, suggesting that Mt2  
98 activity supports host defense against bacteria.

99 Next, we performed age dependent analysis for the ability of adult flies to clear infection.  
100 Surprisingly, we found that  $Mt2^{-/-}$  flies showed significant age-dependent loss in their ability to  
101 clear bacterial infection as compared to wild type flies; an ability regained by replacing  $Mt2$ , as in  
102 the  $MT2-TG$  flies (Fig. 1C). Wild type flies did not show significant loss in their ability to clear  
103 infections over 30 days. In stark contrast, 15 days  $Mt2^{-/-}$  flies cleared bacteria 8-10 fold less  
104 efficiently. 30 day old flies showed similar deficiency, suggesting that there is a steep decline in  
105 ability to clear infection from day 2 to day 15.

106  **$Mt2$ -Null animals have age dependent defects in hematopoiesis:** The earliest difference  
107 between  $Mt2^{+/+}$  and  $Mt2^{-/-}$  we could find in the cellular response was in the third instar larvae. We  
108 found that crystal cells, which are platelet like cells involved in melanization, are higher in number  
109 in  $Mt2^{-/-}$  animals as compared to  $Mt2^{+/+}$  (Suppl. Fig. 1A). This indicated that numbers of blood  
110 cells are not as well-regulated in the mutant. This data led us to look closely at the number of  
111 hemocytes in adults as they age (Fig. 2A). 15 day old wild type animal had fewer number of  
112 hemocytes, when compared to a 2 day old fly. In contrast, the number of hemocytes significantly  
113 increased in the  $Mt2^{-/-}$  with age, a trend opposite to that of the wild type fly and the  $Mt2-TG$  line.  
114 This would indicate that the increase in hemocytes with age is a  $Mt2^{-/-}$  specific event. While  
115 counting the hemocytes using light microscopy, we also noticed that the hemocytes in  $Mt2^{-/-}$   
116 animals had ellipsoid, rice grain like shape as compared to circular shapes in the wild-type  
117 hemocytes. To get a clearer picture we employed Scanning electron microscopy (SEM; See  
118 *Materials and Methods*). When compared to round wild type hemocytes, the  $Mt2^{-/-}$  hemocytes  
119 appeared flat, folded and C-shaped (Fig. 2B), reminiscent of diseased Sickle shaped human RBC's.  
120 Quantitation of the roundness index of the image SEM data indicated a dramatic change in shape  
121 of the hemocytes in  $Mt2^{-/-}$  animals (Fig. 2B, C). This change in cell shape could account for the

122 inefficiency of the *Mt2*<sup>-/-</sup> hemocytes in clearing the bacterial load in the animal. Based on the above  
123 results, we tested transcript levels of *serpent* (*srp*), a gene involved in regulating hemocyte  
124 morphology and phagocytic function (Petersen et al., 1999; Ramet et al., 2002; Shlyakhover et al.,  
125 2018) for 15 day old flies. *Srp* shows reduction in transcript levels (Fig. 2D). This suggests that  
126 *Mt2* regulates *srp*/*Srp* expression directly or indirectly, affecting the cellular arm of immunity. We  
127 then measured transcript levels, for 15 day old animals for *eater* (Kroeger et al., 2012) and *u*-  
128 *shaped* (Muratoglu et al., 2007), genes known to be critical for hemocyte phagocytosis and  
129 hemocyte cell proliferation, respectively. We find that these transcripts are significantly lower in  
130 *Mt2*<sup>-/-</sup> flies as opposed to wild type and the rescue flies (Fig. 2E), again indicating a decline in the  
131 ability of flies to mount an effective cellular transcriptional response to infection. The above data  
132 strongly suggests that *Mt2* plays a key role in maintenance of healthy immune response in older  
133 flies via transcription of genes involved in the cellular arm of fly immunity. This *Mt2* function  
134 appears to become more critical as the fly ages. In the next section, we tested the transcriptional  
135 levels of genes that code for the anti-microbial peptides, *Diptericin* (*Dipt*), *Attacin D* (*AttD*) and  
136 *Drosomycin* (*Drs*). These genes are activated by Toll/NFκB or IMD/NFκB signaling and serve as  
137 readout for these pathways.

138 ***Mt2*-null animals show age dependent decline in AMPs:** Real time PCR data was used to  
139 measure whole animal transcript levels of *Dipt*, *AttD* and *Drs* for day 2 and day 15 post eclosion.  
140 For this experiment, males of the correct age were infected with *E. coli* and transcript levels were  
141 measured at 0 and 6 Hours post-infection. Wild type flies two days post eclosion, showed 275 fold,  
142 75 fold and 100 fold increase in transcripts for *Dipt*, *AttD* and *Drs* respectively on infection. In  
143 contrast, all three genes showed 800 fold, 140 fold and 175 fold increase in transcripts for *Dipt*,  
144 *AttD* and *Drs* respectively (Fig. 3A) for *Mt2*<sup>-/-</sup>. For *Mt2-TG*, the transcript levels were similar to



145 *Mt2*<sup>+/+</sup>. This suggests, that in younger (2 Day) *Mt2*<sup>-/-</sup> animals, the humoral immune response is  
146 robust and may be stronger than that in wild-type flies. For 15 day old *Mt2*<sup>-/-</sup> flies, transcripts of all  
147 three genes, *Dipt*, *AttD* and *Drs* were minimally responsive to infection (Fig. 3B), indicating a  
148 breakdown in signaling or lack of transcription by the NFκBs, DL, Dif and REL.

149 **Mt2 regulates lipid homeostasis in the ageing fly:** The altered shape of hemocytes at day 15 led  
150 us to profile the lipid content of *Mt2*<sup>-/-</sup> animals 2-15 day post eclosion. A TAG-specific TLC  
151 analysis of the total adult fly lipidome from 2-15 days old showed significant decrease in  
152 triglycerides in *Mt2*<sup>-/-</sup> animals. There appeared to be a 30% decrease in Triglyceride (TAG) levels  
153 based on quantitation of TLC bands from day 1 to day 15 (Fig. 4A). MS based quantitative  
154 lipidomics was then used to measure changes in the total lipidome for 15 day old flies (Fig. 4B;  
155 Suppl. Fig 1B). We found that the immuno-modulatory lipids, sphingosine-1-phosphate (S1P) and  
156 ceramides of varying fatty acid chain lengths, accumulated 2-3 fold in *Mt2*<sup>-/-</sup> flies as compared to  
157 their WT counterparts. Concomitantly, the downstream products of sphingolipid metabolism (Fig.  
158 5A), TAGs and phosphoethanolamine (PE) showed a ~25% decrease in *Mt2*<sup>-/-</sup> flies (Suppl. Fig.  
159 1B). The levels of lipids in the *Mt2-TG* rescue line was comparable to wild type. We found that  
160 several other lipid classes including neutral lipids, phospholipids (except PE), sphingomyelins,  
161 and sterols remained unchanged indicating a specific role of Mt2 in regulation of sphingolipid  
162 metabolism (Acharya and Acharya, 2005; Kraut, 2011; Saba and Hla, 2004), especially those  
163 important in immune signaling (Rivera et al., 2008). Next, we checked if, as in case of immune  
164 regulation, Mt2 also regulates lipid homeostasis in age-dependent manner. And indeed, *Mt2*<sup>-/-</sup>  
165 showed comparable levels of S1P till day 3 post eclosion, but, by day 5, S1P starts to accumulate  
166 in these mutants as compared to controls (Fig. 4C). This accumulation is more profound as the fly  
167 ages (Fig. 4C). This accumulation of S1P led us to probe if the enzyme Sply, that converts S1P to

168 PE (Fig. 5A), is affected. We observed a direct correlation between S1P accumulation and the  
169 failure of *Mt2*<sup>-/-</sup> flies to increase Sply activity with age as compared to controls (Fig. 4D).

## 170 DISCUSSION

171 Organisms have to manage energy in order to survive. Energy homeostasis is dependent  
172 on energy uptake, storage and expenditure. Since feeding is a discontinuous process, energy is  
173 usually stored in the form of carbohydrates, proteins or lipids to maintain a continuous supply in  
174 times of need. The *Drosophila* fat body, oenocytes, gut, malphigian tubules and special regions  
175 of the nervous system play key roles in metabolic regulation and energy homeostasis. Metabolic  
176 pathways are conserved between mammals and the fly allowing *Drosophila* to serve as a powerful  
177 model system to get a better understanding of functioning of complex metabolic networks (Owusu-  
178 Ansah and Perrimon, 2014; Padmanabha and Baker, 2014; Rajan and Perrimon, 2013; Schlegel  
179 and Stainier, 2007) including those of lipids. A finely tuned network of regulators and inter-organ  
180 communication is necessary to balance the energy intake, storage and expenditure of energy,  
181 whereby a deregulation of such networks can cause malfunction and disease.

182 Lipids, in addition to being storage molecules and playing structural roles in membranes,  
183 have increasingly been shown to have roles in signaling. Lipids, along with enzymes that modify  
184 and interconvert lipids constitute complex lipid signaling networks responsible for cellular and  
185 organismal homeostasis (Owusu-Ansah and Perrimon, 2014; Palm et al., 2012)(Fig. 5A  
186 summarizes *Drosophila* sphingolipid metabolic pathways). In sphingolipid metabolism levels of  
187 storage metabolites such as S1P, ceramides and TAG have to be maintained in a dynamic manner  
188 for cellular homeostasis. *Drosophila* mutants have contributed to insights into critical roles for  
189 sphingolipids in biological function. For example, mutants for sphingosine kinases (*Sphk*), which

190 generate the important intra and intercellular signaling molecule S1P, and S1P-lyase (*Sply*) (Lovric  
191 et al., 2017), which breaks S1P down, have interesting developmental defects. *Sply* mutants show  
192 severe flight muscle defects as well as activation of apoptosis in reproductive organs (Herr et al.,  
193 2003; Phan et al., 2007), presumably by accumulating S1P. *Sphk* mutants should have reduced  
194 S1P and accumulate Sphingosine. *Sphk2* mutants, in fact, have flight defects and reduced fecundity  
195 (Herr et al., 2003). *Sply* phenotypes can be rescued by mutations in *lace*, which codes for a serine  
196 palmitoyl transferase that is a critical rate limiting step for ceramide synthesis. Ceramides act as  
197 regulators of apoptosis and are also shown to directly affect phosphorylation of retinoblastoma (Rb)  
198 in response to TNF $\alpha$  signaling (Lee et al., 1996). S1P, in mammalian context, is shown to function  
199 via GPCRs and is suggested to regulate events such as cell shape change in PC12 cells (Edsall et  
200 al., 2001).

201 We find that *Mt2*<sup>-/-</sup> mutants are unable to deal with infections as they age. As early as 15  
202 days post eclosion, mutant flies are severely compromised in terms of their ability to clear  
203 infection, with plasmatocytes having disproportionately high number but defective shape. This  
204 finding parallels an imbalance in lipid homeostasis. Quantitative lipidomics confirms that S1P  
205 levels are four-fold higher than in controls, though sphingosine levels are normal. This would  
206 suggest, based on our current understanding of S1P regulation that *Sply* activity may be reduced.  
207 This is confirmed by enzyme activity assays in fly lysates that show reduction of *Sply* activity  
208 (Fig. 4D). Reduction in activity does not appear to be a result of lower transcript levels as *sply*  
209 mRNA levels do not decrease significantly (data not shown). The phenotypes could be due to  
210 errors in translation due to tRNA methylation defects earlier reported in *Mt2* mutants.  
211 Alternatively, *sply* could be regulated in tissue/immune specific manner in flies in a way similar  
212 to seen in *C. elegans*, where expression of S1P lyase is regulated by GATAA-like transcription

213 factors and limit its expression to gut (Oskouian et al., 2005). In *Drosophila*, Srp is one of the  
214 GATAA-like transcription factors known to regulate Aldehyde dehydrogenase (Abel et al., 1993)  
215 and immune specific genes in tissue specific manner (Petersen et al., 1999; Senger et al., 2006). It  
216 would be interesting to see whether there is any regulatory link between Srp and Sply and if Mt2  
217 plays a key role in this communication.

218 The lipidomics data also suggests that Ceramide levels are higher while neutral lipids are reduced  
219 suggesting more than one link in lipid metabolism affected in *Mt2*<sup>-/-</sup> mutants. The three-fold  
220 increase in Ceramide levels suggest either a backflow from Sphingosine, which is maintained at  
221 normal levels, or increased activity of enzymes that metabolize Ceramide. Curiously, TAG levels  
222 are low which may suggest that the conversion of Ceramide to TAG via DAG is overactive in  
223 order to compensate for the low TAG levels. The decreased TAG levels suggest either a need for  
224 energy in the animal of a malfunction of enzymes (Fig. 5A) maintaining homeostatic levels of  
225 TAG.

226 The defective ‘sickle’-shaped hemocyte morphology (Fig. 2B, C) suggest architectural  
227 problems in maintaining the shape of the cell; with lipid homeostasis being a prime candidate.  
228 Since sphingolipids are critical for membrane architecture, the aberrant morphology and  
229 subsequent inability to function as macrophages may be a consequence of a reduction of  
230 sphingolipids. Mutations in S1P lyase have been implicated in regulation of cell shape with our  
231 data suggesting its malfunction being a specific cause of sickle morphology.

232 The correlation between imbalance in lipid homeostasis and host defense is a less explored  
233 area of research. It is understood that with environmental or nutrient stress, accumulation of lipids  
234 or signaling intermediates can interfere with immune regulation (Ertunc and Hotamisligil, 2016).

235 Sphingolipid imbalance has been specifically linked to a number of studies (Bandhuvula and Saba,  
236 2007; Bektas et al., 2010; Park et al., 2013; Rivera et al., 2008; Vijayan et al., 2017; Weber et al.,  
237 2009), but universal mechanisms are lacking.

238 Our study puts the spotlight on age-dependent regulation of lipid homeostasis and immune  
239 function. Mt2 activity, either through regulation of transcription of critical genes or by regulation  
240 of translation of protein products is important for a robust immune response in the aging animal  
241 (Fig. 5B). Absence of Mt2 function triggers an age-dependent decline in both the cellular and  
242 humoral arms of the immune response. The mechanism that Mt2 utilizes for such a systemic  
243 regulation is unclear because of the uncertainties related to Mt2 function in *Drosophila*. Mt2  
244 function has a history of dispute (Krauss and Reuter, 2011; Schaefer and Lyko, 2010; Yoder and  
245 Bestor, 1996) over its importance in the growth and development of the organism and also its  
246 molecular function. Low levels (0.1 – 0.6%) of 5-genomic methylcytosine (5mC) have been  
247 detected in *Drosophila* (Capuano et al., 2014; Panikar et al., 2015; Takayama et al., 2014) with  
248 dynamic, developmental stage specific alteration in methylation patterns in *Mt2* null animals  
249 (Panikar, 2018; Takayama et al., 2014). Under normal conditions, complete knockdown of Mt2  
250 has no visible survival defects, not only in flies, but also in rat and plant models (Goll et al., 2006).  
251 This led to a belief that *Mt2* is not a vital gene for the organism. We, along with others, show that  
252 Mt2 is required for increased lifespan under stress conditions. Here, in addition, we propose a  
253 novel function for Mt2 in regulating steady increase in Sply activity, a phenomenon essential to  
254 keep S1P levels in check as the fly ages. In absence of Mt2 function, this regulatory mechanism is  
255 lost, S1P starts to accumulate with age, leading to adverse effects on the ability of the fly to deal  
256 with infection. Our study, thus uncovers a novel and unexpected relationship between Mt2  
257 mediated activity, age associated lipid homeostasis and the robust nature of the immune response.

## 258 EXPERIMENTAL PROCEDURES

259 *Flystocks*. Wild-type, W1118 ( $Mt2^{+/+}$ ),  $Mt2$  null  $Mt2^{-/-}$  ( $Dnmt2^{99}$  (Schaefer et al., 2010)) and  
260 transgenic rescue  $Mt2-TG$  (w1118; pGeno>>Dnmt2-EGFP (Schaefer et al., 2008)) flies were  
261 maintained on standard corn meal medium at 25°C.  $Mt2^{-/-}$  and  $Mt2-TG$  flies were provided by Dr.  
262 Frank Lyko (DKFZ, Germany) and Dr. Matthias Schaefer (MFPL, Austria, Vienna) respectively.  
263 The lines were validated by measuring transcript levels in  $Mt2^{-/-}$ , genomic PCR to confirm  
264 deletion as described by (Schaefer et al., 2010) and PCR followed by sequencing to confirm  $Mt2-$   
265  $TG$  flies (data not shown).

266 *Survival Analysis*. For survival assays, 30 three day old males from each genotype ( $Mt2^{+/+}$ ,  $Mt2^{-/-}$   
267  $^{-/-}$  and  $Mt2-TG$ ) were maintained on standard medium at 25 °C or 29 °C. Another set of 30 flies,  
268 each pricked with 1X PBS or a 20 Hour old culture of ampicillin resistant *E. coli* (DH5 $\alpha$ ). Dead  
269 flies were removed every day and food vials were changed every day. Surviving flies were scored  
270 for two weeks at both temperatures i.e. 25 °C as well as 29 °C. Thirty flies were tested for each  
271 genotype for each condition in biological quadruplets. Kaplan-Meier and Log Rank (Mantel-Cox)  
272 test was performed using GraphPad Prism 5.0 to analyze the data.

273 *Bacterial Clearance Assay*. 2 day, 15 day and 30 day old male flies from each genotype ( $Mt2^{+/+}$ ,  
274  $Mt2^{-/-}$  and  $Mt2-TG$ ) were pricked with *E. coli* and kept at 25 °C for 6 hours. Four live flies from  
275 each genotype were surface sterilized using 70% ethanol. Flies were air-dried and washed twice  
276 with autoclaved MQ under sterile condition, crushed in 100 $\mu$ L of LB and plated on Ampicillin  
277 containing Agar plates. Colony count was taken and plotted in the form of bar graph. The  
278 experiment was repeated thrice for each genotype. Results were analyzed using One-way ANOVA  
279 in GraphPad Prism 5.0.

280 *Hemocyte count.* Hemolymph was extracted as described (Neyen et al., 2014). In brief, 15 flies (1  
281 day and 15 day old males) from each genotype were placed on a 10  $\mu$ M filter spin column  
282 (ThermoFisher, Cat. No. 69705), covered with 4 mm glass beads (Zymoresearch, Cat. No. S1001  
283 Rattler<sup>TM</sup>) and centrifuged for 20 min at 4 °C, 10 K rpm in a microcentrifuge. The extracted  
284 hemolymph was collected in 20 $\mu$ L of 1X PBS solution containing 0.01% phenylthiourea, to  
285 prevent melanization of hemolymph, and counted using a Brightline hemocytometer as described  
286 (Kacsoh and Schlenke, 2012). The experiment was repeated thrice for each genotype. The total  
287 number of hemocytes per fly was plotted and One-Way ANOVA was performed in GraphPad  
288 Prism 5.0 to analyze the results.

289 *Counting Crystal Cells in Larvae:* Crystal cells were visualized by heating thirty 3<sup>rd</sup> instar larva  
290 from each genotype (*Mt2*<sup>+/+</sup> and *Mt2*<sup>-/-</sup>) at 60 °C for 10 minutes. Photographs were taken using  
291 Zeiss microscope (AxioVision) and crystal cells were counted using ImageJ software. The results  
292 were analysed in GraphPad Prism 5.0 using Student's t-test.

293 *Real time PCR.* Total RNA was extracted from all the samples 0 and 6 hours of post infection  
294 (Direct-zol<sup>TM</sup> RNA MiniPrep Cat. No. R2050). cDNA was then synthesized from 1 ug total RNA  
295 using High capacity cDNA synthesis kit (Cat No. 4368814). Quantitative PCR experiments were  
296 accomplished with a StepOnePlus machine (ABI) and using SYBR Green (ABI, Catalog #  
297 4368706). Relative gene expression was calculated after normalization to the control RpL32/rp49  
298 mRNA. The primer sequences are available as *Suppl. Table 2*.

299 *SEM (Scanning Electron Microscopy).* Hemocytes from 1 and 15 day old adult males for *Mt2*<sup>+/+</sup>,  
300 *Mt2*<sup>-/-</sup> genotypes were isolated as described in an earlier section. The drop of hemocytes was  
301 allowed to settle down on silicon wafer for 30 minutes at room temperature. Hemocytes were then

302 washed with 20 $\mu$ L of 1X PBS (Phosphate buffered saline, pH 7). 20 $\mu$ L of fixing solution (50%  
303 ethanol, 5% acetic acid and 1% Para-formaldehyde) was added on to cells and kept overnight at  
304 4<sup>o</sup> C in a clean chamber. Next day cells were washed with 50%, 70%, 90% and 100% ethanol, air  
305 dried and imaged using Zeiss FE-SEM. Circularity index was calculated using Image J software  
306 (Circularity plugin). A perfect circle gets indicated by circularity value of 1.0 and as this value  
307 gets closer 0, it indicates an elongated polygon.

308 *Lipid extraction for thin layer chromatography (TLC)*: Lipid isolation was done using a modified  
309 Folch extraction protocol (Kamat et al., 2015). Briefly, 5 whole adult males were crushed in 1ml  
310 DPBS in a glass vial and 1ml Methanol was added, and the mixture vortexed. Thereafter, 2ml of  
311 chloroform was added to these samples and vortexed vigorously. The sample was then centrifuged  
312 at 2800g for 5 minutes to separate the aqueous and organic phases. The organic phase (bottom)  
313 containing lipids was collected in clean glass vial. To enrich for phospholipids, the aqueous layer  
314 was acidified using 2.5% v/v formic acid, and re-extracted using 2 ml chloroform, and the two  
315 phases were separated by centrifugation at 2800g for 5 mins. The two organic phases were pooled  
316 and dried using N<sub>2</sub> gas. The sample was spotted onto silica TLC plates using a glass capillary. The  
317 solvent system used was that of Wilfling *et. al.* (Wilfling et al., 2013) with minor modifications.  
318 The TLC was run using two different mobile phases sequentially. The first solvent was a mixture  
319 of n-hexane/diethyl ether/acetic acid (70:30:1). The first solvent was run halfway upto the top of  
320 the plate, after which the plate was air-dried. The plate was then run in solvent mixture of n-  
321 hexene:diethyl ether (59:1). The plate was dried and visualized by spraying with 10% (w/v) CuSO<sub>4</sub>  
322 in 8% (v/v) H<sub>3</sub>PO<sub>4</sub> followed by baking in the oven above 150<sup>o</sup>C for 20 mins. The plates were  
323 scanned and quantified using Image J-software.



324 *Quantitative lipidomics:* All lipid extractions were done as described above, with small  
325 modifications (Kamat et al., 2015). Briefly, the 5 whole adult males were washed with PBS (x 3  
326 times), and transferred into a glass vial using 1 mL PBS. 3 mL of 2:1 (vol/vol) CHCl<sub>3</sub>: MeOH with  
327 the internal standard mix (100 pmol of each internal standard listed in *Suppl. Table 3*) was added,  
328 and the mixture was vigorously vortexed. The two phases were separated by centrifugation at  
329 2800g for 5 minutes. The organic phase (bottom) was removed, 50 µL of formic acid was added  
330 to acidify the aqueous homogenate (to enhance extraction of phospholipids), and CHCl<sub>3</sub> was added  
331 to make up 4 mL volume. The mixture was vortexed, and separated using centrifugation described  
332 above. Both the organic extracts were pooled, and dried under a stream of N<sub>2</sub>. The lipidome was  
333 re-solubilized in 200 µL of 2:1 (vol/vol) CHCl<sub>3</sub>: MeOH, and 20 µL was used for the targeted LC-  
334 MS analysis. All the lipid species analyzed in this study were quantified using the multiple reaction  
335 monitoring (MRM) method (see *Suppl. Table 3*) on an AbSciex QTrap 4500 LC-MS with a  
336 Shimadzu Exion-LC series quaternary pump. All data was collected using the Acquisition mode  
337 of the Analyst software, and analyzed using the Quantitate mode of the same software. The LC  
338 separation was achieved using a Gemini 5U C-18 column (Phenomenex, 5 µm, 50 x 4.6 mm)  
339 coupled to a Gemini guard column (Phenomenex, 4 x 3 mm, Phenomenex security cartridge). The  
340 LC solvents were: For positive mode: buffer A: 95:5 (vol/vol) H<sub>2</sub>O: MeOH + 0.1% formic acid +  
341 10 mM ammonium formate; and buffer B: 60:35:5 (vol/vol) iPrOH: MeOH: H<sub>2</sub>O + 0.1% formic  
342 acid + 10 mM ammonium formate, For Negative mode: buffer A: 95:5 (vol/vol) H<sub>2</sub>O: MeOH +  
343 0.1% ammonium hydroxide; and buffer B: 60:35:5 (vol/vol) iPrOH: MeOH: H<sub>2</sub>O + 0.1%  
344 ammonium hydroxide. All the MS based lipid estimations was performed using an electrospray  
345 ion source, using the following MS parameters: ion source = turbo spray, collision gas = medium,  
346 curtain gas = 20 L/min, ion spray voltage = 4500 V, temperature = 400 °C. A typical LC-run

347 consisted of 55 minutes, with the following solvent run sequence post injection: 0.3 ml/min 0%  
348 buffer B for 5 minutes, 0.5 ml/min 0% buffer B for 5 minutes, 0.5 ml/min linear gradient of buffer  
349 B from 0 – 100% over 25 minutes, 0.5 ml/min of 100% buffer B for 10 minutes, and re-  
350 equilibration with 0.5 ml/min of 0% buffer B for 10 minutes. A detailed list of all the species  
351 targeted in this MRM study, describing the precursor parent ion mass and adduct, the product ion  
352 targeted can be found in *Supp. Table 3B*. All the endogenous lipid species were quantified by  
353 measuring the area under the curve in comparison to the respective internal standard and then  
354 normalized to the number of flies. All the data is represented as mean  $\pm$  s. e. m. of 5 biological  
355 replicates per group (*Suppl. Table 3*).

356 *Sply activity assay*: Total protein was isolated from 5 flies per replicate per genotype. 15  $\mu$ g of  
357 proteome was incubated with 100  $\mu$ M S1P (S9666, Sigma) in a reaction volume of 100  $\mu$ L in PBS  
358 at 37°C with constant shaking. After 30 minutes the reaction was quenched with 350  $\mu$ L of 2:1  
359 (vol/vol) CHCl<sub>3</sub>: MeOH, doped with 250 pmol internal standard, cis-10-heptadecenoic acid (C17:1  
360 FFA). The mixture was vortexed, and centrifuged at 2800 g for 5 minutes to separate the aqueous  
361 (top) and organic (bottom) phase. The organic phase was collected and dried under a stream of N<sub>2</sub>  
362 gas, re-solubilized in 100  $\mu$ L of 2:1 (vol/vol) CHCl<sub>3</sub>: MeOH, and subjected to LC-MS analysis. A  
363 fraction of the organic extract (~ 20  $\mu$ L) was injected onto an AbSciex QTrap 4500 LC-MS with  
364 a Shimadzu Exion-LC series quaternary pump. LC separation was achieved using a Gemini 5U C-  
365 18 column (Phenomenex, 5  $\mu$ m, 50 x 4.6 mm) coupled to a Gemini guard column (Phenomenex,  
366 4 x 3 mm, Phenomenex security cartridge). The LC solvents were: buffer A: 95:5 (vol/vol) H<sub>2</sub>O:  
367 MeOH + 0.1% ammonium hydroxide, and buffer B: 60:35:5 (vol/vol) iPrOH: MeOH: H<sub>2</sub>O + 0.1%  
368 ammonium hydroxide. A typical LC run consisted of 15 minutes post-injection: 0.1 mL/min 100%  
369 buffer A from for 1.5 minutes, 0.5 mL/min linear gradient to 100% buffer B over 5 minutes, 0.5

370 mL/min 100% buffer B for 5.5 minutes, and equilibration with 0.5 mL/min 100% buffer A for 3  
371 minutes. All MS analysis was performed using an electrospray ionization source in a MS1 scan  
372 negative ion mode for product formation (free fatty acid from S1P). All MS parameters were the  
373 same as those described in the MS-based lipids profiling method described above. Measuring the  
374 area under the peak, and normalizing it to the internal standard quantified the product release for  
375 the lipid substrate hydrolysis assays. The substrate hydrolysis rate was corrected by subtracting  
376 the non-enzymatic rate of hydrolysis, which was obtained by using heat-denatured proteome (15  
377 minutes at 95 °C, followed by cooling at 4 °C for 10 mins x 3 times) as a control. All the data is  
378 represented as mean  $\pm$  s. e. m. of 3 biological replicates.

### 379 **ACKNOWLEDGEMENTS**

380 Funding for this research came from intramural and Department of Biotechnology (DBT) grants  
381 to GR. DD is supported by UGC-UPE Phase II Biotechnology [UGC-262(A)(1)] and SPPU-DRDP  
382 grant. SSK acknowledges funding from the Wellcome Trust-DBT India Alliance (grant:  
383 IA/I/15/2/502058). Shabnam Patil and Jeet Kalia are thanked for technical assistance with and  
384 access to the LC-MS facility respectively at IISER Pune, and Ajeet Singh is thanked for access to  
385 the LC-MS facility at CAMS, NCL Venture Center. VA and BK are Graduate Students supported  
386 by fellowships from CSIR, Govt. of India.

### 387 **AUTHOR CONTRIBUTIONS**

388 VA and BK designed and carried out all of the experiments. SK designed and coordinated data  
389 related to lipid measurements. DD and GR conceived, designed and coordinated the study and  
390 drafted the manuscript.

### 391 **CONFLICT OF INTEREST**

392 The authors declare that no conflict of interest exist.

## REFERENCES

- Abel, T., Michelson, A. M. and Maniatis, T.** (1993). A Drosophila GATA family member that binds to Adh regulatory sequences is expressed in the developing fat body. *Development* **119**, 623-33.
- Acharya, U. and Acharya, J. K.** (2005). Enzymes of sphingolipid metabolism in Drosophila melanogaster. *Cell Mol Life Sci* **62**, 128-42.
- Adada, M. M., Canals, D., Jeong, N., Kelkar, A. D., Hernandez-Corbacho, M., Pulkoski-Gross, M. J., Donaldson, J. C., Hannun, Y. A. and Obeid, L. M.** (2015). Intracellular sphingosine kinase 2-derived sphingosine-1-phosphate mediates epidermal growth factor-induced ezrin-radixin-moesin phosphorylation and cancer cell invasion. *FASEB J* **29**, 4654-69.
- Agaisse, H., Petersen, U. M., Boutros, M., Mathey-Prevot, B. and Perrimon, N.** (2003). Signaling role of hemocytes in Drosophila JAK/STAT-dependent response to septic injury. *Dev Cell* **5**, 441-50.
- Akira, S., Uematsu, S. and Takeuchi, O.** (2006). Pathogen recognition and innate immunity. *Cell* **124**, 783-801.
- Anderson, K. V.** (2000). Toll signaling pathways in the innate immune response. *Curr Opin Immunol* **12**, 13-9.
- Bandhuvula, P. and Saba, J. D.** (2007). Sphingosine-1-phosphate lyase in immunity and cancer: silencing the siren. *Trends Mol Med* **13**, 210-7.
- Basu, A., Tomar, A., Dasari, V., Mishra, R. K. and Khosla, S.** (2016). DNMT3L enables accumulation and inheritance of epimutations in transgenic Drosophila. *Sci Rep* **6**, 19572.
- Becker, M., Muller, S., Nellen, W., Jurkowski, T. P., Jeltsch, A. and Ehrenhofer-Murray, A. E.** (2012). Pmt1, a Dnmt2 homolog in Schizosaccharomyces pombe, mediates tRNA methylation in response to nutrient signaling. *Nucleic Acids Res* **40**, 11648-58.
- Bektas, M., Allende, M. L., Lee, B. G., Chen, W., Amar, M. J., Remaley, A. T., Saba, J. D. and Proia, R. L.** (2010). Sphingosine 1-phosphate lyase deficiency disrupts lipid homeostasis in liver. *J Biol Chem* **285**, 10880-9.
- Brennan, C. A. and Anderson, K. V.** (2004). Drosophila: the genetics of innate immune recognition and response. *Annu Rev Immunol* **22**, 457-83.
- Buchon, N., Silverman, N. and Cherry, S.** (2014). Immunity in Drosophila melanogaster--from microbial recognition to whole-organism physiology. *Nat Rev Immunol* **14**, 796-810.
- Capuano, F., Mulleder, M., Kok, R., Blom, H. J. and Ralser, M.** (2014). Cytosine DNA methylation is found in Drosophila melanogaster but absent in Saccharomyces cerevisiae, Schizosaccharomyces pombe, and other yeast species. *Anal Chem* **86**, 3697-702.
- Clark, R. I., Walker, D. W. and Dionne, M. S.** (2014). Metabolic and immune integration in aging and age-related disease. *Aging (Albany NY)* **6**, 3-4.
- Delaney, J. R., Stoven, S., Uvell, H., Anderson, K. V., Engstrom, Y. and Mlodzik, M.** (2006). Cooperative control of Drosophila immune responses by the JNK and NF-kappaB signaling pathways. *EMBO J* **25**, 3068-77.
- DeVeale, B., Brummel, T. and Seroude, L.** (2004). Immunity and aging: the enemy within? *Aging Cell* **3**, 195-208.
- Durdevic, Z., Hanna, K., Gold, B., Pollex, T., Cherry, S., Lyko, F. and Schaefer, M.** (2013). Efficient RNA virus control in Drosophila requires the RNA methyltransferase Dnmt2. *EMBO Rep* **14**, 269-75.
- Edsall, L. C., Cuvillier, O., Twitty, S., Spiegel, S. and Milstien, S.** (2001). Sphingosine kinase expression regulates apoptosis and caspase activation in PC12 cells. *J Neurochem* **76**, 1573-84.

- Ertunc, M. E. and Hotamisligil, G. S.** (2016). Lipid signaling and lipotoxicity in metaflammation: indications for metabolic disease pathogenesis and treatment. *J Lipid Res* **57**, 2099-2114.
- Felix, T. M., Hughes, K. A., Stone, E. A., Drnevich, J. M. and Leips, J.** (2012). Age-specific variation in immune response in *Drosophila melanogaster* has a genetic basis. *Genetics* **191**, 989-1002.
- Ferrandon, D., Imler, J. L., Hetru, C. and Hoffmann, J. A.** (2007). The *Drosophila* systemic immune response: sensing and signalling during bacterial and fungal infections. *Nat Rev Immunol* **7**, 862-74.
- Goll, M. G., Kirpekar, F., Maggert, K. A., Yoder, J. A., Hsieh, C. L., Zhang, X., Golic, K. G., Jacobsen, S. E. and Bestor, T. H.** (2006). Methylation of tRNA<sup>Asp</sup> by the DNA methyltransferase homolog Dnmt2. *Science* **311**, 395-8.
- Govind, S.** (1999). Control of development and immunity by rel transcription factors in *Drosophila*. *Oncogene* **18**, 6875-87.
- Govind, S. and Nehm, R. H.** (2004). Innate immunity in fruit flies: a textbook example of genomic recycling. *PLoS Biol* **2**, E276.
- Grewal, S. S.** (2009). Insulin/TOR signaling in growth and homeostasis: a view from the fly world. *Int J Biochem Cell Biol* **41**, 1006-10.
- Herr, D. R., Fyrst, H., Phan, V., Heinecke, K., Georges, R., Harris, G. L. and Saba, J. D.** (2003). Sply regulation of sphingolipid signaling molecules is essential for *Drosophila* development. *Development* **130**, 2443-53.
- Hetru, C. and Hoffmann, J. A.** (2009). NF-kappaB in the immune response of *Drosophila*. *Cold Spring Harb Perspect Biol* **1**, a000232.
- Hinkovska-Galcheva, V., Boxer, L., Mansfield, P. J., Schreiber, A. D. and Shayman, J. A.** (2003). Enhanced phagocytosis through inhibition of de novo ceramide synthesis. *J Biol Chem* **278**, 974-82.
- Horn, L., Leips, J. and Starz-Gaiano, M.** (2014). Phagocytic ability declines with age in adult *Drosophila* hemocytes. *Aging Cell* **13**, 719-28.
- Ip, Y. T., Reach, M., Engstrom, Y., Kadalayil, L., Cai, H., Gonzalez-Crespo, S., Tatei, K. and Levine, M.** (1993). Dif, a dorsal-related gene that mediates an immune response in *Drosophila*. *Cell* **75**, 753-63.
- Iwasaki, A. and Medzhitov, R.** (2010). Regulation of adaptive immunity by the innate immune system. *Science* **327**, 291-5.
- Janeway, C. A., Jr. and Medzhitov, R.** (2002). Innate immune recognition. *Annu Rev Immunol* **20**, 197-216.
- Johnson, S. C., Rabinovitch, P. S. and Kaeberlein, M.** (2013). mTOR is a key modulator of ageing and age-related disease. *Nature* **493**, 338-45.
- Kacsoh, B. Z. and Schlenke, T. A.** (2012). High hemocyte load is associated with increased resistance against parasitoids in *Drosophila suzukii*, a relative of *D. melanogaster*. *PLoS One* **7**, e34721.
- Kamat, S. S., Camara, K., Parsons, W. H., Chen, D. H., Dix, M. M., Bird, T. D., Howell, A. R. and Cravatt, B. F.** (2015). Immunomodulatory lysophosphatidylserines are regulated by ABHD16A and ABHD12 interplay. *Nat Chem Biol* **11**, 164-71.
- Kapahi, P., Kaeberlein, M. and Hansen, M.** (2017). Dietary restriction and lifespan: Lessons from invertebrate models. *Ageing Res Rev* **39**, 3-14.
- Kounatidis, I., Chtarbanova, S., Cao, Y., Hayne, M., Jayanth, D., Ganetzky, B. and Ligoxygakis, P.** (2017). NF-kappaB Immunity in the Brain Determines Fly Lifespan in Healthy Aging and Age-Related Neurodegeneration. *Cell Rep* **19**, 836-848.
- Kounatidis, I. and Ligoxygakis, P.** (2012). *Drosophila* as a model system to unravel the layers of innate immunity to infection. *Open Biol* **2**, 120075.
- Kraft, M.** (2016). Sphingolipid Organization in the Plasma Membrane and the Mechanisms That Influence It. *Front Cell Dev Biol.* **4**, 154.

- Krauss, V. and Reuter, G.** (2011). DNA methylation in *Drosophila*--a critical evaluation. *Prog Mol Biol Transl Sci* **101**, 177-91.
- Kraut, R.** (2011). Roles of sphingolipids in *Drosophila* development and disease. *J Neurochem* **116**, 764-78.
- Kroeger, P. T., Jr., Tokusumi, T. and Schulz, R. A.** (2012). Transcriptional regulation of eater gene expression in *Drosophila* blood cells. *Genesis* **50**, 41-9.
- Lee, J. Y., Hannun, Y. A. and Obeid, L. M.** (1996). Ceramide inactivates cellular protein kinase Calpha. *J Biol Chem* **271**, 13169-74.
- Lemaitre, B. and Hoffmann, J.** (2007). The host defense of *Drosophila melanogaster*. *Annu Rev Immunol* **25**, 697-743.
- Lemaitre, B., Meister, M., Govind, S., Georgel, P., Steward, R., Reichhart, J. M. and Hoffmann, J. A.** (1995). Functional analysis and regulation of nuclear import of dorsal during the immune response in *Drosophila*. *EMBO J* **14**, 536-45.
- Lemaitre, B., Nicolas, E., Michaut, L., Reichhart, J. M. and Hoffmann, J. A.** (1996). The dorsoventral regulatory gene cassette spatzle/Toll/cactus controls the potent antifungal response in *Drosophila* adults. *Cell* **86**, 973-83.
- Ligoxygakis, P.** (2013). Genetics of immune recognition and response in *Drosophila* host defense. *Adv Genet* **83**, 71-97.
- Lin, M. J., Tang, L. Y., Reddy, M. N. and Shen, C. K.** (2005). DNA methyltransferase gene dDnmt2 and longevity of *Drosophila*. *J Biol Chem* **280**, 861-4.
- Lovric, S., Goncalves, S., Gee, H. Y., Oskouian, B., Srinivas, H., Simons, M., Riezman, H., Antignac, C., Saba, J. D. et al.** (2017). Mutations in sphingosine-1-phosphate lyase cause nephrosis with ichthyosis and adrenal insufficiency. *J Clin Invest* **127**, 912-928.
- Mackenzie, D. K., Bussiere, L. F. and Tinsley, M. C.** (2011). Senescence of the cellular immune response in *Drosophila melanogaster*. *Exp Gerontol* **46**, 853-9.
- Matova, N. and Anderson, K. V.** (2010). *Drosophila* Rel proteins are central regulators of a robust, multi-organ immune network. *J Cell Sci* **123**, 627-33.
- Muratoglu, S., Hough, B., Mon, S. T. and Fossett, N.** (2007). The GATA factor Serpent cross-regulates lozenge and u-shaped expression during *Drosophila* blood cell development. *Dev Biol* **311**, 636-49.
- Neyen, C., Bretscher, A. J., Binggeli, O. and Lemaitre, B.** (2014). Methods to study *Drosophila* immunity. *Methods* **68**, 116-28.
- Okano, M., Xie, S. and Li, E.** (1998). Cloning and characterization of a family of novel mammalian DNA (cytosine-5) methyltransferases. *Nat Genet* **19**, 219-20.
- Oskouian, B., Mendel, J., Shocron, E., Lee, M. A., Jr., Fyrst, H. and Saba, J. D.** (2005). Regulation of sphingosine-1-phosphate lyase gene expression by members of the GATA family of transcription factors. *J Biol Chem* **280**, 18403-10.
- Owusu-Ansah, E. and Perrimon, N.** (2014). Modeling metabolic homeostasis and nutrient sensing in *Drosophila*: implications for aging and metabolic diseases. *Dis Model Mech* **7**, 343-50.
- Padmanabha, D. and Baker, K. D.** (2014). *Drosophila* gains traction as a repurposed tool to investigate metabolism. *Trends Endocrinol Metab* **25**, 518-27.
- Palm, W., Sampaio, J. L., Brankatschk, M., Carvalho, M., Mahmoud, A., Shevchenko, A. and Eaton, S.** (2012). Lipoproteins in *Drosophila melanogaster*--assembly, function, and influence on tissue lipid composition. *PLoS Genet* **8**, e1002828.
- Panikar, C. P., MS; Deshmukh, S; Abhyankar, V; Deobagkar, DD.** (2018). DNA methylation changes in a gene-specific manner in different developmental stages of *Drosophila melanogaster*. *Current Science* **112**.



- Panikar, C. S., Rajpathak, S. N., Abhyankar, V., Deshmukh, S. and Deobagkar, D. D.** (2015). Presence of DNA methyltransferase activity and CpC methylation in *Drosophila melanogaster*. *Mol Biol Rep* **42**, 1615-21.
- Park, K., Elias, P. M., Shin, K. O., Lee, Y. M., Hupe, M., Borkowski, A. W., Gallo, R. L., Saba, J., Holleran, W. M. and Uchida, Y.** (2013). A novel role of a lipid species, sphingosine-1-phosphate, in epithelial innate immunity. *Mol Cell Biol* **33**, 752-62.
- Partridge, L., Alic, N., Bjedov, I. and Piper, M. D.** (2011). Ageing in *Drosophila*: the role of the insulin/Igf and TOR signalling network. *Exp Gerontol* **46**, 376-81.
- Petersen, U. M., Kadalayil, L., Rehorn, K. P., Hoshizaki, D. K., Reuter, R. and Engstrom, Y.** (1999). Serpent regulates *Drosophila* immunity genes in the larval fat body through an essential GATA motif. *EMBO J* **18**, 4013-22.
- Phan, V. H., Herr, D. R., Panton, D., Fyrst, H., Saba, J. D. and Harris, G. L.** (2007). Disruption of sphingolipid metabolism elicits apoptosis-associated reproductive defects in *Drosophila*. *Dev Biol* **309**, 329-41.
- Rajan, A. and Perrimon, N.** (2013). Of flies and men: insights on organismal metabolism from fruit flies. *BMC Biol* **11**, 38.
- Ramet, M., Manfrulli, P., Pearson, A., Mathey-Prevot, B. and Ezekowitz, R. A.** (2002). Functional genomic analysis of phagocytosis and identification of a *Drosophila* receptor for *E. coli*. *Nature* **416**, 644-8.
- Rivera, J., Proia, R. L. and Olivera, A.** (2008). The alliance of sphingosine-1-phosphate and its receptors in immunity. *Nat Rev Immunol* **8**, 753-63.
- Saba, J. D. and Hla, T.** (2004). Point-counterpoint of sphingosine 1-phosphate metabolism. *Circ Res* **94**, 724-34.
- Schaefer, M. and Lyko, F.** (2010). Solving the Dnmt2 enigma. *Chromosoma* **119**, 35-40.
- Schaefer, M., Pollex, T., Hanna, K., Tuorto, F., Meusburger, M., Helm, M. and Lyko, F.** (2010). RNA methylation by Dnmt2 protects transfer RNAs against stress-induced cleavage. *Genes Dev* **24**, 1590-5.
- Schaefer, M., Steringer, J. P. and Lyko, F.** (2008). The *Drosophila* cytosine-5 methyltransferase Dnmt2 is associated with the nuclear matrix and can access DNA during mitosis. *PLoS One* **3**, e1414.
- Schlegel, A. and Stainier, D. Y.** (2007). Lessons from "lower" organisms: what worms, flies, and zebrafish can teach us about human energy metabolism. *PLoS Genet* **3**, e199.
- Schneider, D. S.** (2007). How and why does a fly turn its immune system off? *PLoS Biol* **5**, e247.
- Senger, K., Harris, K. and Levine, M.** (2006). GATA factors participate in tissue-specific immune responses in *Drosophila* larvae. *PNAS U S A* **103**, 15957-62.
- Shlyakhover, E., Shklyar, B., Hakim-Mishnaevski, K., Levy-Adam, F. and Kurant, E.** (2018). *Drosophila* GATA Factor Serpent Establishes Phagocytic Ability of Embryonic Macrophages. *Front Immunol* **9**, 266.
- Silverman, N., Zhou, R., Erlich, R. L., Hunter, M., Bernstein, E., Schneider, D. and Maniatis, T.** (2003). Immune activation of NF-kappaB and JNK requires *Drosophila* TAK1. *J Biol Chem* **278**, 48928-34.
- Tafesse, F. G., Rashidfarrokhi, A., Schmidt, F. I., Freinkman, E., Dougan, S., Dougan, M., Esteban, A., Maruyama, T., Strijbis, K. and Ploegh, H. L.** (2015). Disruption of Sphingolipid Biosynthesis Blocks Phagocytosis of *Candida albicans*. *PLoS Pathog* **11**, e1005188.
- Takayama, S., Dhahbi, J., Roberts, A., Mao, G., Heo, S. J., Pachter, L., Martin, D. I. and Boffelli, D.** (2014). Genome methylation in *D. melanogaster* is found at specific short motifs and is independent of DNMT2 activity. *Genome Res* **24**, 821-30.

- Tang, L. Y., Reddy, M. N., Rasheva, V., Lee, T. L., Lin, M. J., Hung, M. S. and Shen, C. K.** (2003). The eukaryotic DNMT2 genes encode a new class of cytosine-5 DNA methyltransferases. *J Biol Chem* **278**, 33613-6.
- Tanji, T. and Ip, Y. T.** (2005). Regulators of the Toll and Imd pathways in the Drosophila innate immune response. *Trends Immunol* **26**, 193-8.
- Thiagarajan, D., Dev, R. R. and Khosla, S.** (2011). The DNA methyltransferase Dnmt2 participates in RNA processing during cellular stress. *Epigenetics* **6**, 103-13.
- Unckless, R. L., Rottschaefer, S. M. and Lazzaro, B. P.** (2015). The complex contributions of genetics and nutrition to immunity in Drosophila melanogaster. *PLoS Genet* **11**, e1005030.
- Uvell, H. and Engstrom, Y.** (2007). A multilayered defense against infection: combinatorial control of insect immune genes. *Trends Genet* **23**, 342-9.
- Vijayan, M., Xia, C., Song, Y. E., Ngo, H., Studstill, C. J., Drews, K., Fox, T. E., Johnson, M. C., Hiscott, J., Kester, M. et al.** (2017). Sphingosine 1-Phosphate Lyase Enhances the Activation of IKKepsilon To Promote Type I IFN-Mediated Innate Immune Responses to Influenza A Virus Infection. *J Immunol* **199**, 677-687.
- Weber, C., Krueger, A., Munk, A., Bode, C., Van Veldhoven, P. P. and Graler, M. H.** (2009). Discontinued postnatal thymocyte development in sphingosine 1-phosphate-lyase-deficient mice. *J Immunol* **183**, 4292-301.
- Wilfling, F., Wang, H., Haas, J. T., Krahmer, N., Gould, T. J., Uchida, A., Cheng, J. X., Graham, M., Christiano, R., Frohlich, F. et al.** (2013). Triacylglycerol synthesis enzymes mediate lipid droplet growth by relocalizing from the ER to lipid droplets. *Dev Cell* **24**, 384-99.
- Williams, M. J.** (2007). Drosophila hemopoiesis and cellular immunity. *J Immunol* **178**, 4711-6.
- Yoder, J. A. and Bestor, T. H.** (1996). Genetic analysis of genomic methylation patterns in plants and mammals. *Biol Chem* **377**, 605-10.
- Zerofsky, M., Harel, E., Silverman, N. and Tatar, M.** (2005). Aging of the innate immune response in Drosophila melanogaster. *Aging Cell* **4**, 103-8.



## FIGURE LEGENDS

### **Fig. 1: Life span and bacterial clearance assays suggest a decline in immune function for $Mt2^{-/-}$ flies.**

(A) Mock infected  $Mt2^{-/-}$  flies show a shorter lifespan when compared to mock infected  $Mt2^{+/+}$  animals. When infected with *E. coli*,  $Mt2^{-/-}$  flies show enhanced lethality at 25 °C and 29 °C (data not shown), when compared to infected  $Mt2^{+/+}$  flies. Infected  $Mt2^{-/-}$  flies show increased mortality as compared to mock infected  $Mt2^{-/-}$  flies. Experiments were in biological triplicates, with life spans curves analyzed using Log-rank (Mantel-Cox) Test, in GraphPad Prism version 5. Analysis indicates that the curves  $Mt2^{-/-}$  (mock) vs  $Mt2^{-/-}$  (infected) as well as the  $Mt2^{-/-}$  (infected) vs  $Mt2^{+/+}$  (infected) differ significantly ( $p < 0.0001$ ).

(B) Total bacterial colony forming unit (cfu) count at 0h and 6h post infection for 2 day old  $Mt2^{+/+}$ ,  $Mt2^{-/-}$  and  $Mt2-TG$  males at 25 °C. The  $Mt2^{-/-}$  flies fail to clear bacterial load to the same extent as wild type, 6h post infection. The data represents three independent biological replicates. Data analyzed by 1-way ANOVA. For all figures henceforth, ‘\*’, indicates  $p < 0.01$ , ‘\*\*’,  $p < 0.05$  and ‘\*\*\*’,  $p < 0.001$ .

(C) CfU count for ageing flies at day 1, day 15 and day 30 post eclosion. The 6h post-infection cfu was normalized to the mean 0h cfu in each case. 2-way ANOVA post arcsine transformation was used to test significance. 1 day old  $Mt2^{-/-}$  flies showed a mild deficiency in their ability to clear bacteria, which worsened dramatically with age. N (biological replicates) =3, n (number of flies, for each day/time-point and each genotype) =4.

**Fig. 2: Hematopoiesis is disturbed in  $Mt2^{-/-}$  animals.**

(A) The total hemocyte count for 1 day and 15 day old  $Mt2^{+/+}$ ,  $Mt2^{-/-}$  and  $Mt2-TG$  flies indicates increase in plasmacyte number with age for  $Mt2^{-/-}$  animals, a trend opposite to that of the controls.

The data shown represents three independent biological replicates with 15 males per replicate.

1Way ANOVA followed by tukey test was performed for statistical analysis. N=3, n=15.

(B) Plasmacytes from 15 day old flies imaged using SEM at 5K magnification show that  $Mt2^{-/-}$  show ‘sickle-cell’ morphology, as compared to nearly round cells seen in wild type flies. The bar indicates a linear scale of 2  $\mu$ M.

(C) The linear dimensions of individual cells from SEM images were analyzed using ImageJ and the roundness for each cell was plotted in GraphPad Prism version 5. N=3; n=4. Student’s t-test was used for statistical analysis.

(D) *serpent(srp)* transcript levels, as measured by real-time qPCR were reduced by half in  $Mt2^{-/-}$  animals, without infection. 1WAY ANOVA followed by Tukey’s test were performed as a test of significance. N=3, n=5.

(E) Real time qPCR for *eater* and *u-shaped* was carried out for 15 day old flies’ pre and post infection. The data is a mean of three independent biological replicates (N=3), with 5 animals per experiment (n=5). Interestingly, the production of AMPs and cellular immunity players appear to be lowered with age in  $Mt2^{-/-}$  flies in comparison with  $Mt2^{+/+}$ .

**Fig. 3: Transcriptional response by AMP genes to infection is weaker in 15-day old *Mt2*<sup>-/-</sup> flies.**

Real Time qPCR was used to measure levels of *dipt*, *att-D* and *drs* in response to infection for 3 day and 15 day old adult *Mt2*<sup>+/+</sup>, *Mt2*<sup>-/-</sup> and *MT2-TG* flies. Flies were infected and transcript levels measured at 0 and 6h post infection. Transcripts were normalized to *rp49* and relative fold values (6 hrs / 0 hrs) were plotted. 1way ANOVA followed by Tukey's test was performed as a test of significance. N=3, n=5.

(A) Three day old flies show strong activation of all three AMPs. Activation of AMPs in *Mt2*<sup>-/-</sup> animals is stronger, with *dipt* and *drs* levels being statistically significant.

(B) Fifteen day flies show significantly lower levels of activation for all three AMPs, post infection.

**Fig. 4: Spingosine-1-Phosphate, Ceramides levels increase while Triacylglycerol levels fall with age in *Mt2*<sup>-/-</sup> flies.**

(A) Age dependent drop in TAGs as measured by decrease in band intensities, separated by thin layer chromatography. Chi square test for trend was used for analysis. N=1, n=15.

(B) Heat map that summarizes fold changes in categories of lipid moieties compared between *Mt2*<sup>-/-</sup> and *Mt2-TG*, when normalized to *Mt2*<sup>+/+</sup>, for fifteen day old adult male flies. Red color indicates increase while blue color is fold decrease. S1P and Ceramide levels are 4 fold and 2 fold higher, respectively in *Mt2*<sup>-/-</sup> flies, while Sphingomyelin, Sphingosine, Free fatty acids and overall phospholipid levels do not change significantly. TAGs, PE and PA show ~2 fold decrease in levels. Data for individual lipid moieties can be found in *Suppl. Fig. 1B* and *Suppl. Tables*. N=5, n=2.

(C) Age dependent assay measures S1P levels in adult flies from day 1 to day 15. When compared to  $Mt2^{+/+}$  or  $Mt2-TG$ , S1P levels in  $Mt2^{-/-}$  flies start accumulating 5 days post eclosion. By day 10, the levels are approximately 5-fold higher than that of controls. N=4, n=2.

(D) Enzyme activity assay shows change in Sply activity in  $Mt2^{-/-}$  adult whole body extracts from day 1 to day 15. Sply activity does not increase in  $Mt2^{-/-}$  flies with age as compared to controls. N=3, n=5.

**Fig. 5: Mt2 has a systemic role in providing a robust, age dependent immune function in flies.**

(A) Sphingolipid metabolic pathway in *Drosophila*. Metabolites are in black font while enzymes that are implicated in their conversion are in blue. Lipidomics data suggest age dependent changes in  $Mt2^{-/-}$  flies, with increase in S1P levels, a result in agreement with decrease in activity of Sply. Decrease in Sply activity may also explain the reduction in levels of PE. TAG levels also fall with age.

(B) Model for a role for Mt2 in immunity and aging. Mt2 appears to function by regulating both the cellular and humoral arms of the innate immune response in adult flies, with lipid metabolism being a critical component for a robust response. At the molecular level, this effect would be via methylation of DNA which will regulate transcription or via methylation of tRNA, which would regulate tRNA stability and thus affect total protein activity. The model incorporates data from this study (arrows) as well as interactions found in literature (dotted arrows). The number on the dotted line indicates the source of the data. 1 (Oskouian et al., 2005), 2 (Adada et al., 2015; Kraft, 2016), 3 (Hinkovska-Galcheva et al., 2003; Tafesse et al., 2015), 4 (Ramet et al., 2002; Shlyakhover et al., 2018).

## SUPPL. TABLES (XLS files)

**Suppl. Table 1:** *Lipid data collected for fifteen day old  $Mt2^{+/+}$ ,  $Mt2^{-/-}$  and  $Mt2-TG$  animals.*

**A** (Tab1) LC-MS quantitation of different categories of lipids.

**B** (Tab 2). Details of the Multiple reaction monitoring transitions for the different lipids measured in the experiments.

**Suppl. Table 2:** *Primers used for RT-PCR, sequencing and validation.*

**A**

bioRxiv preprint doi: <https://doi.org/10.1101/362012>; this version posted July 4, 2018. The copyright holder for this preprint (which was not certified by peer review) is the author/funder, who has granted bioRxiv a license to display the preprint in perpetuity. It is made available under aCC-BY 4.0 International license.

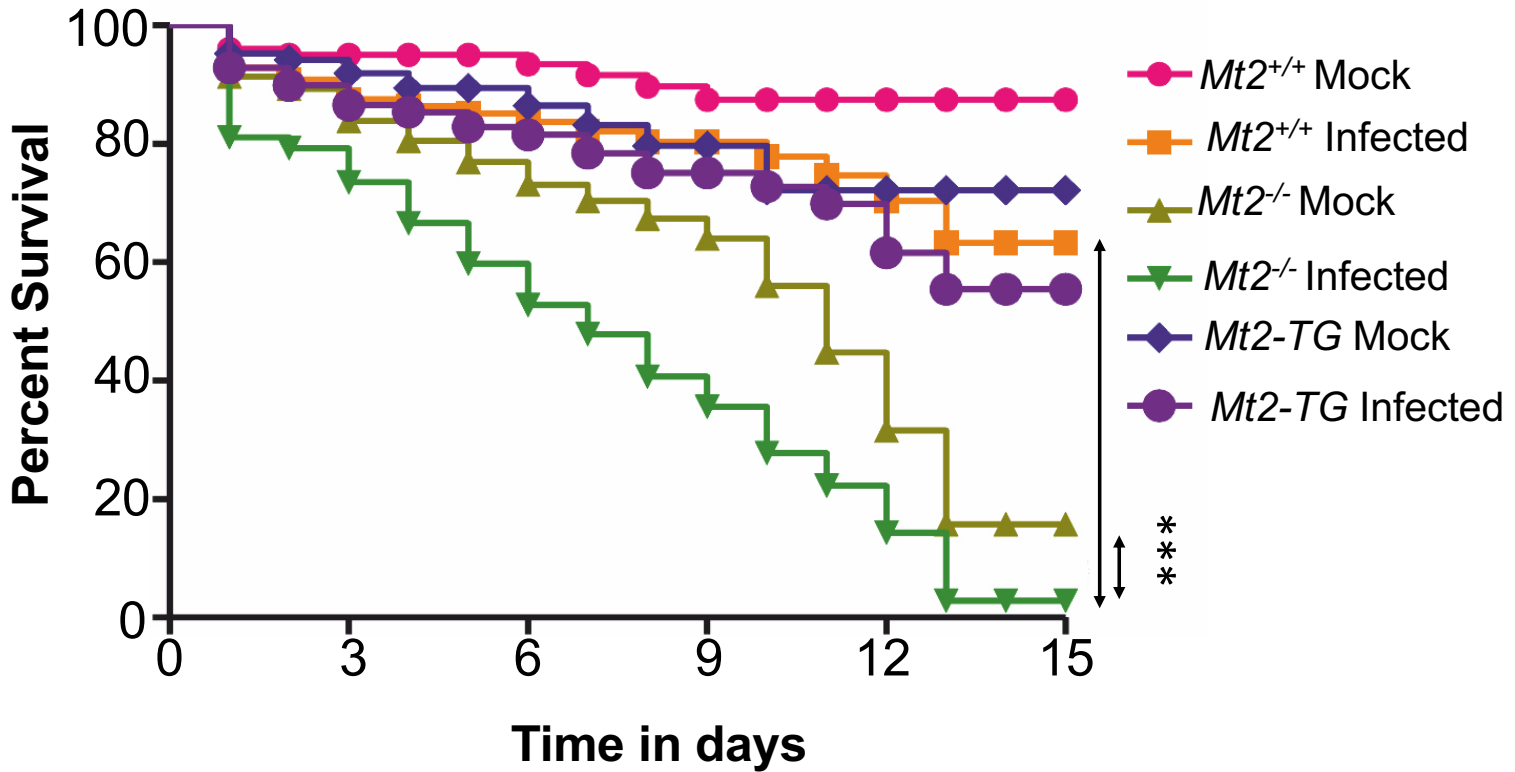

**B**

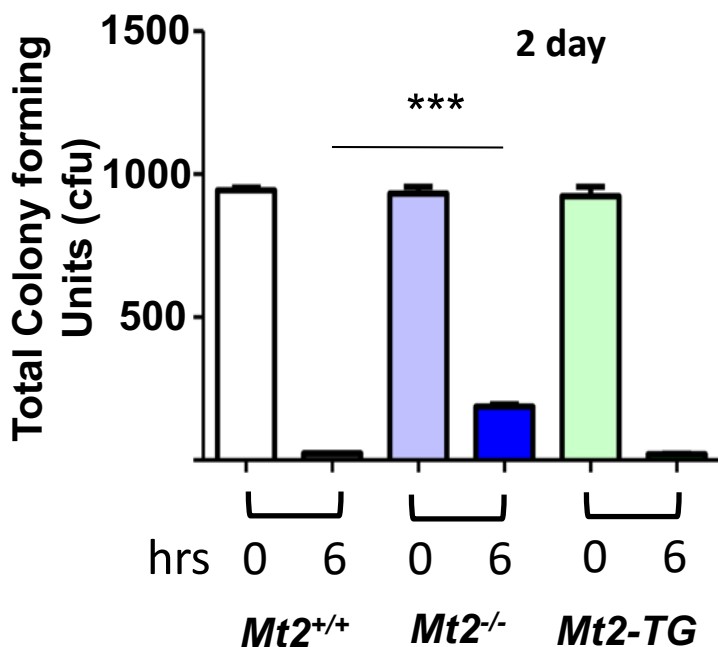

**C**

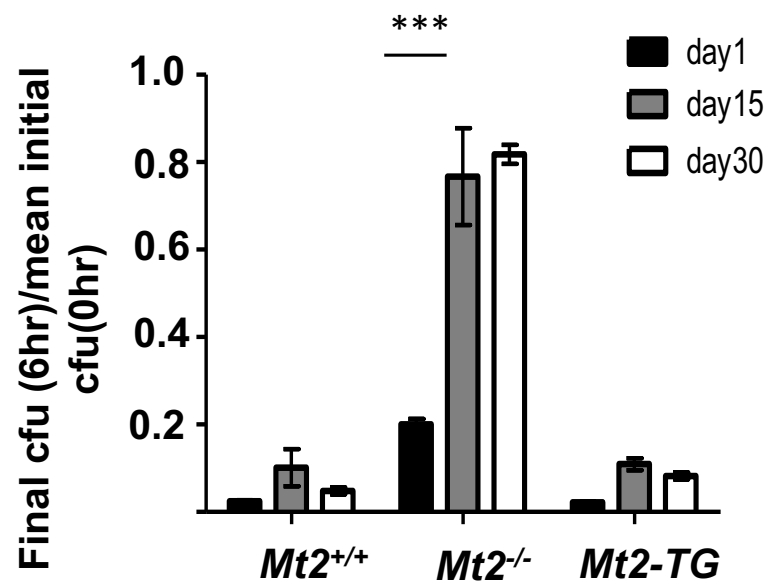

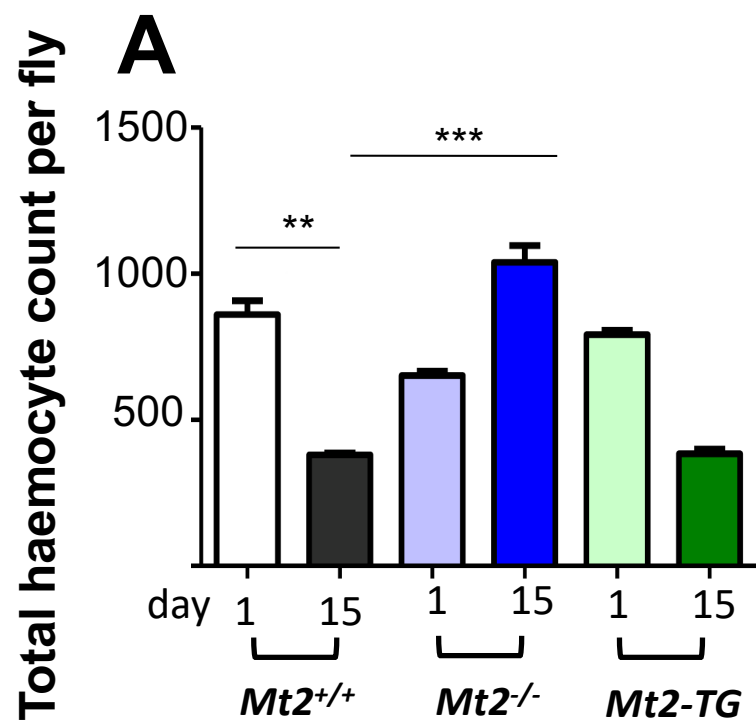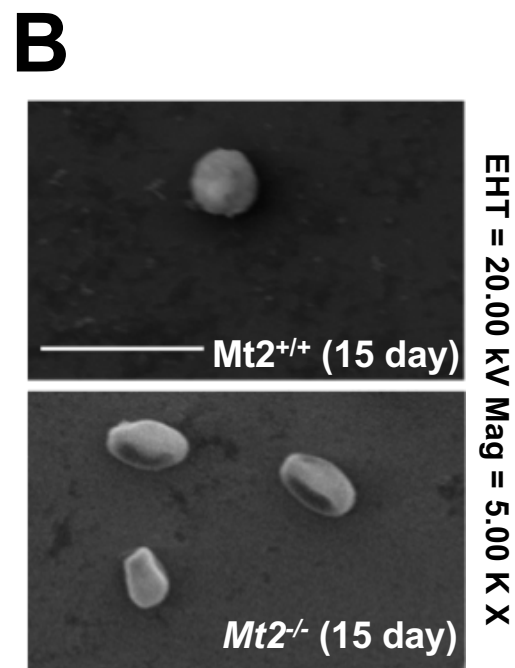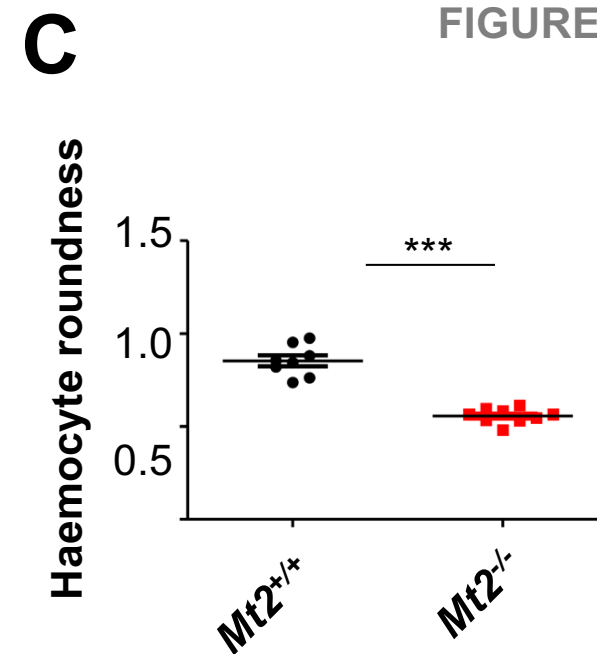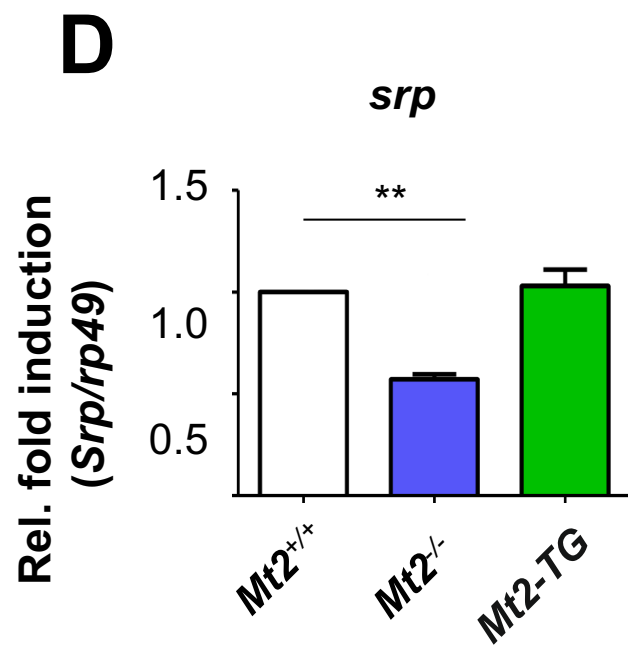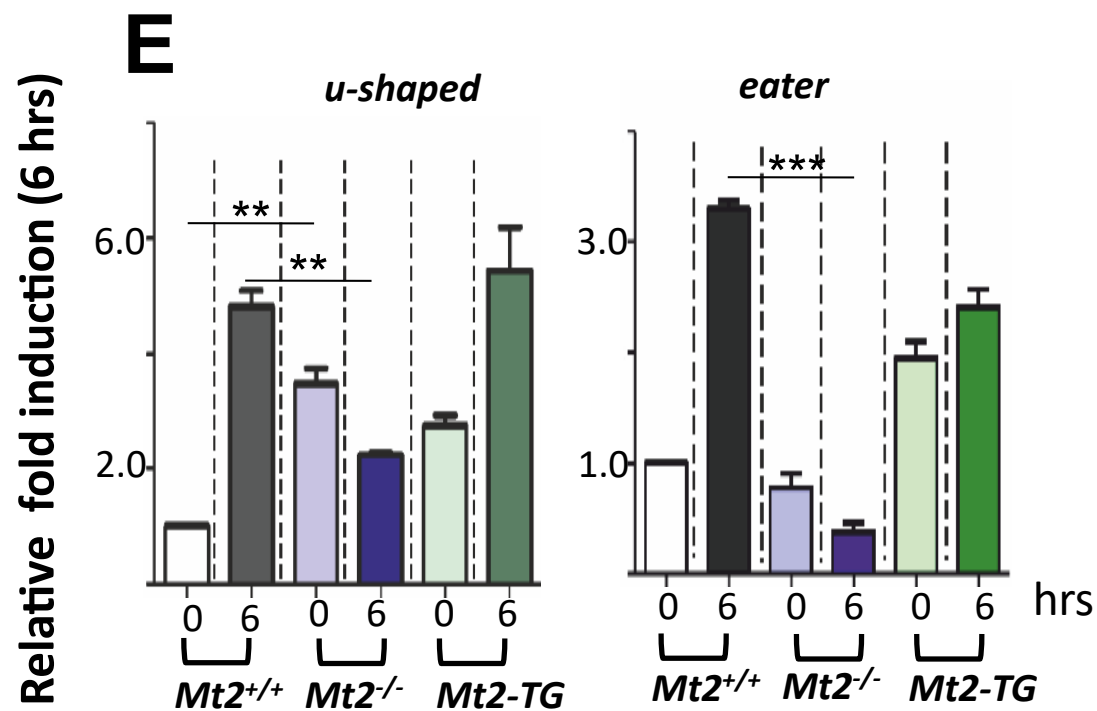

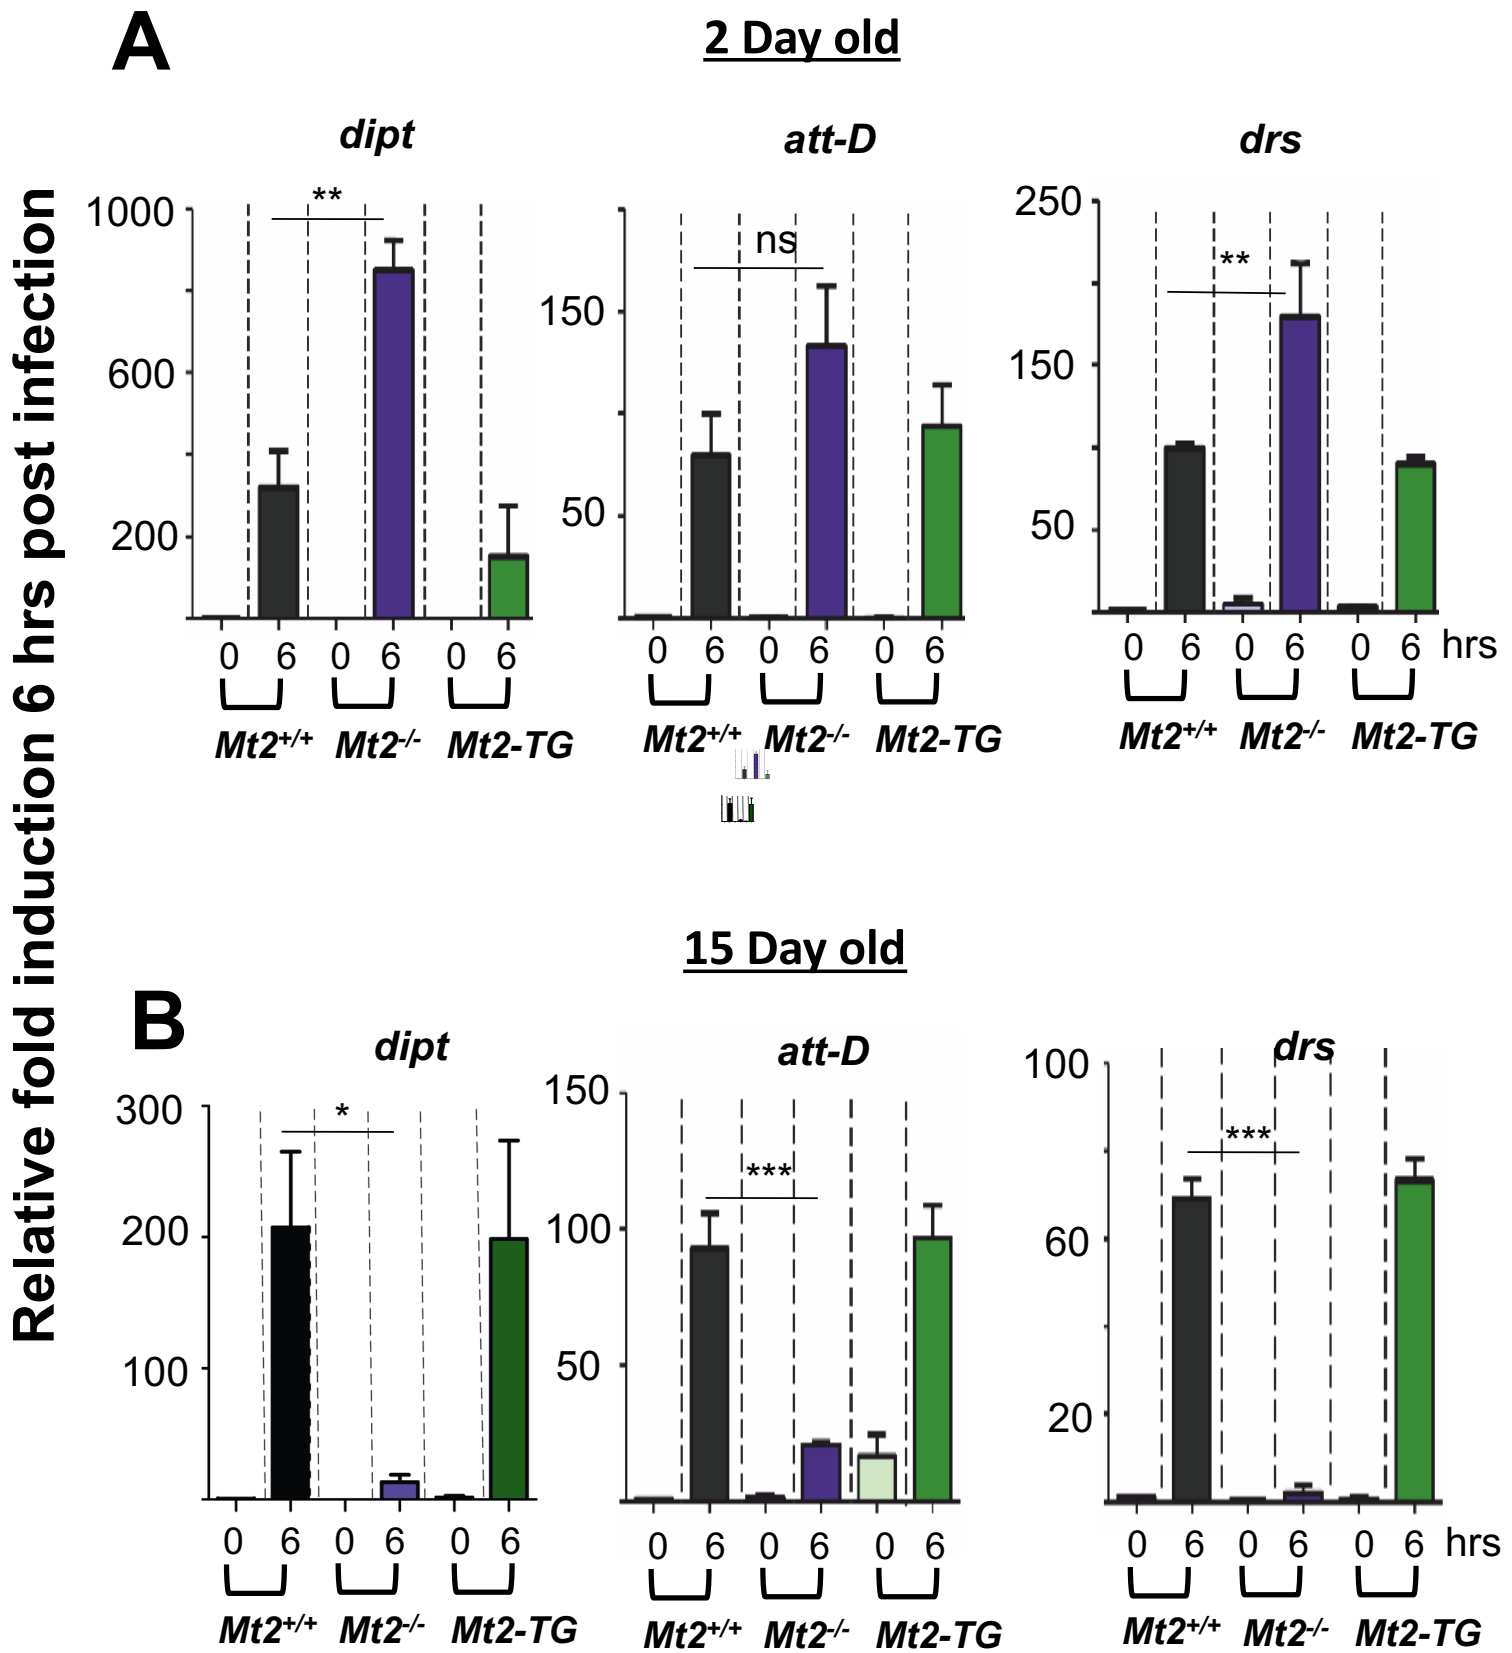



**B**

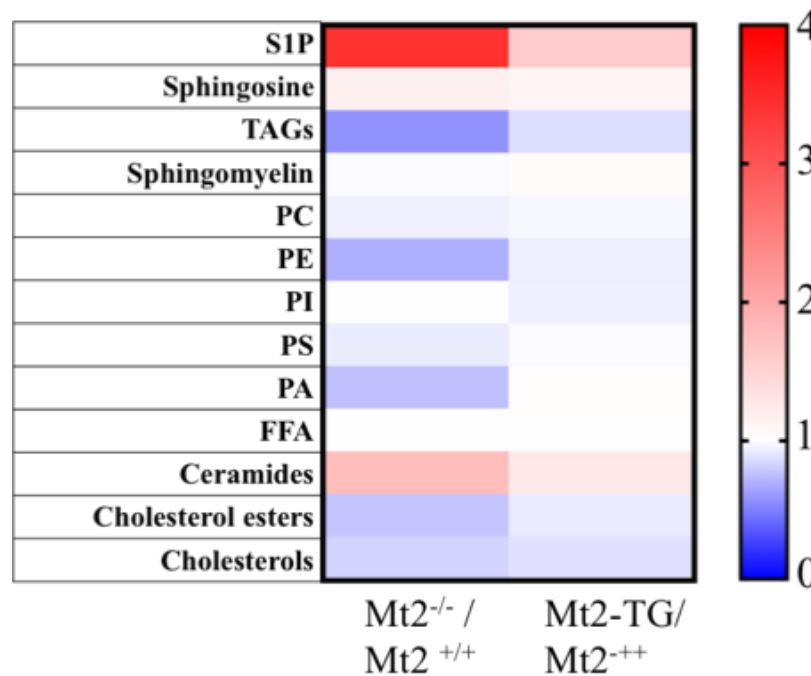

N=5, n=2

**A**

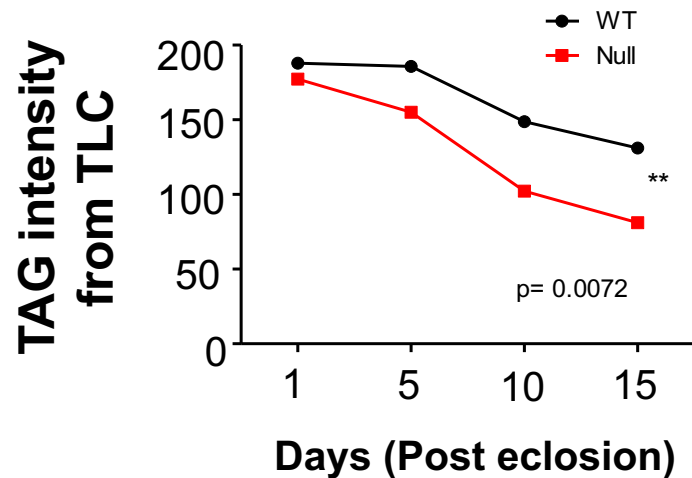

**D**

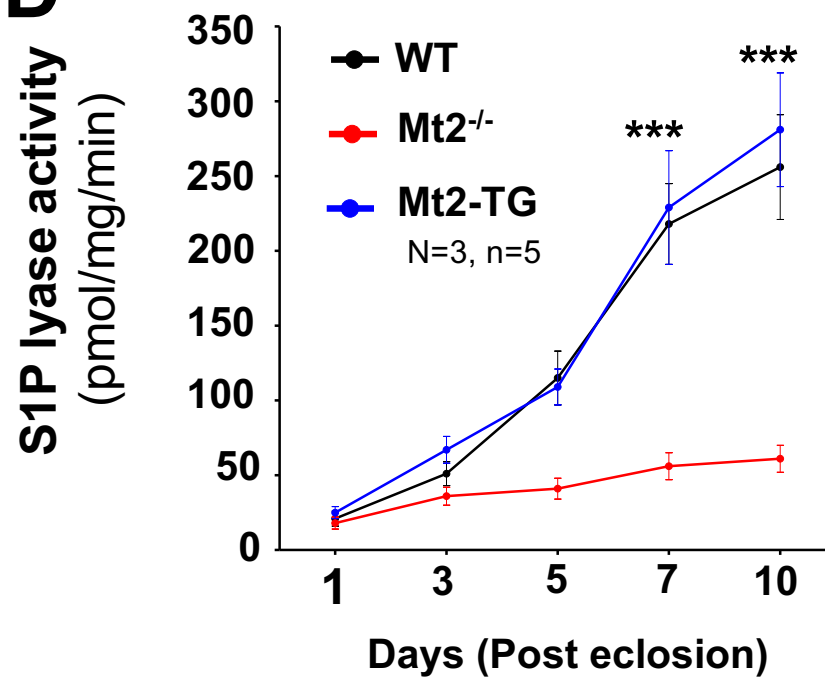

**C**

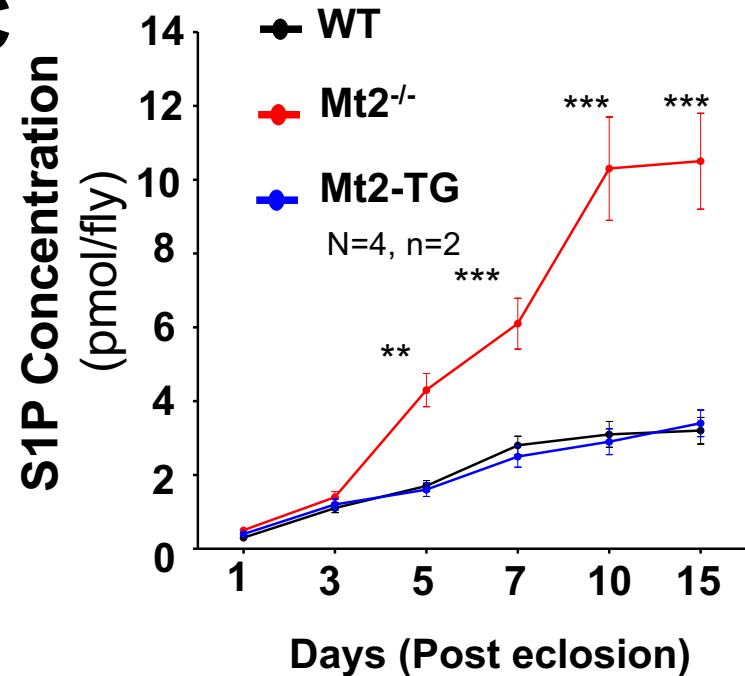

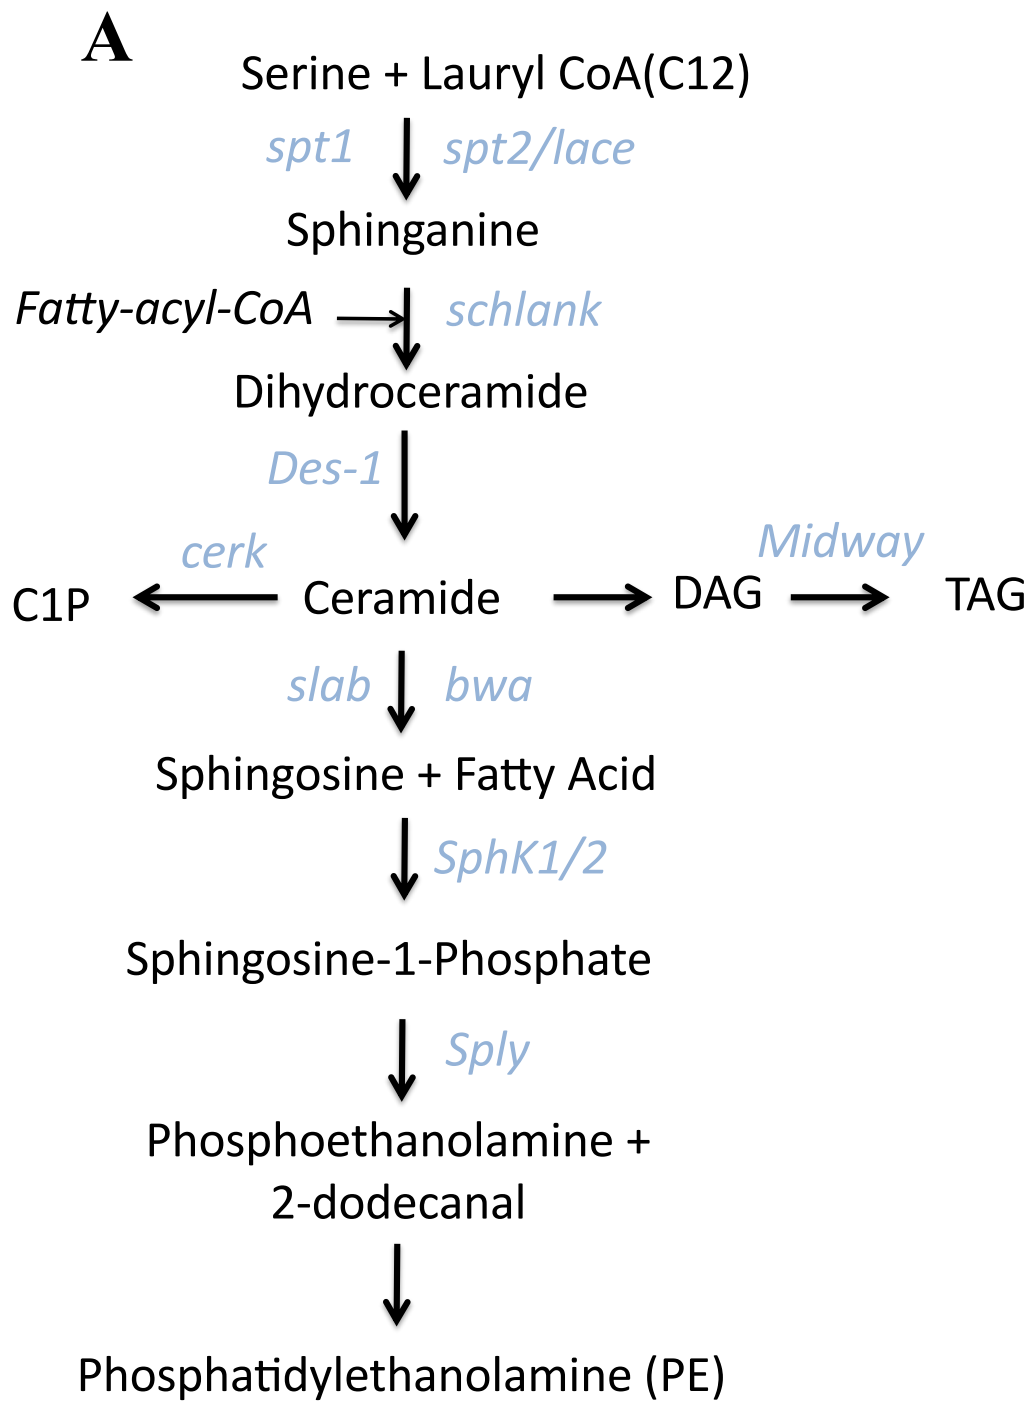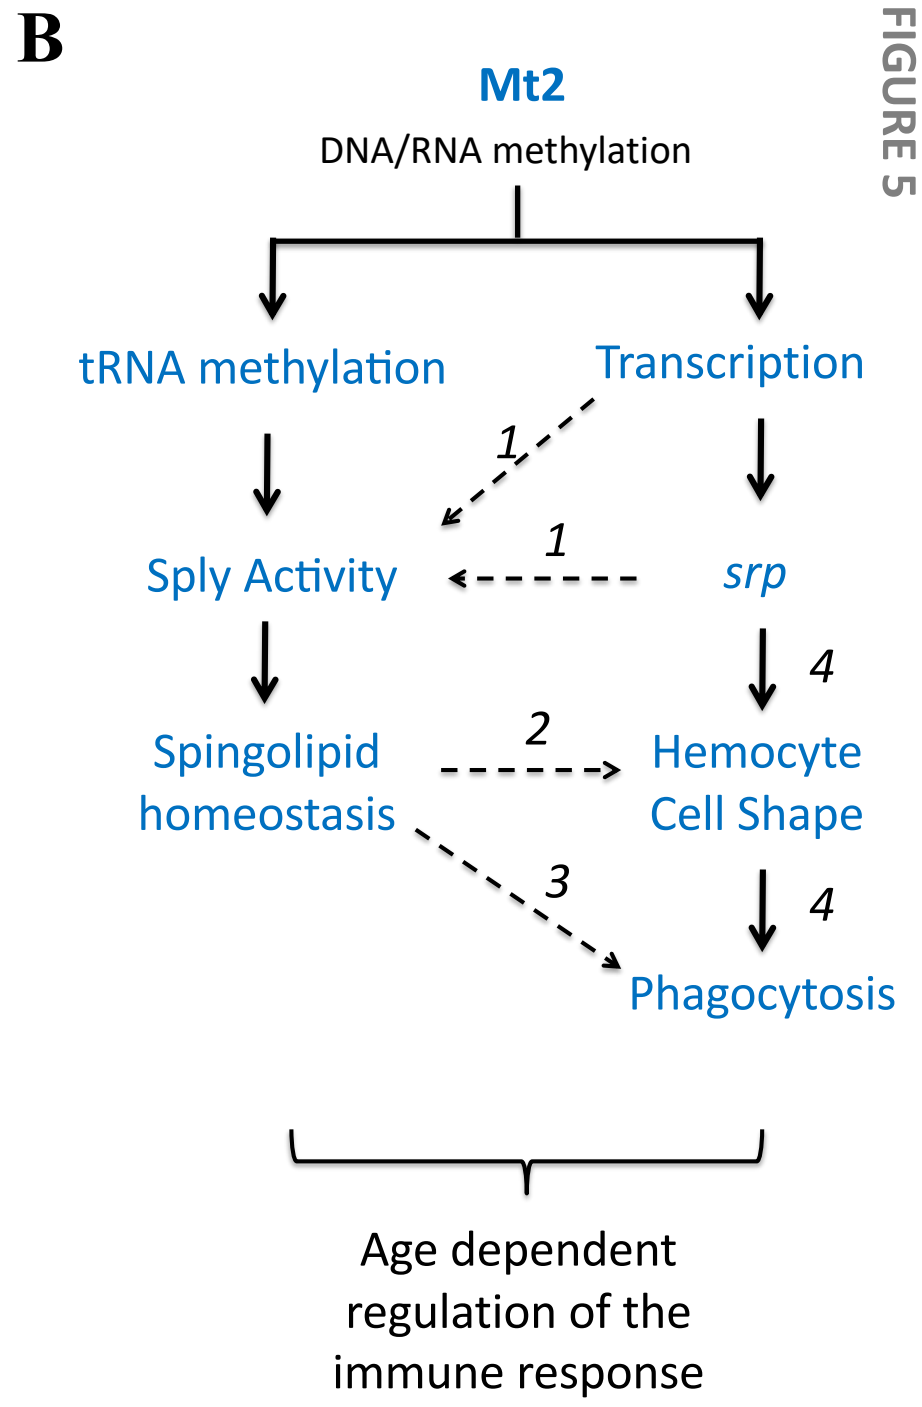

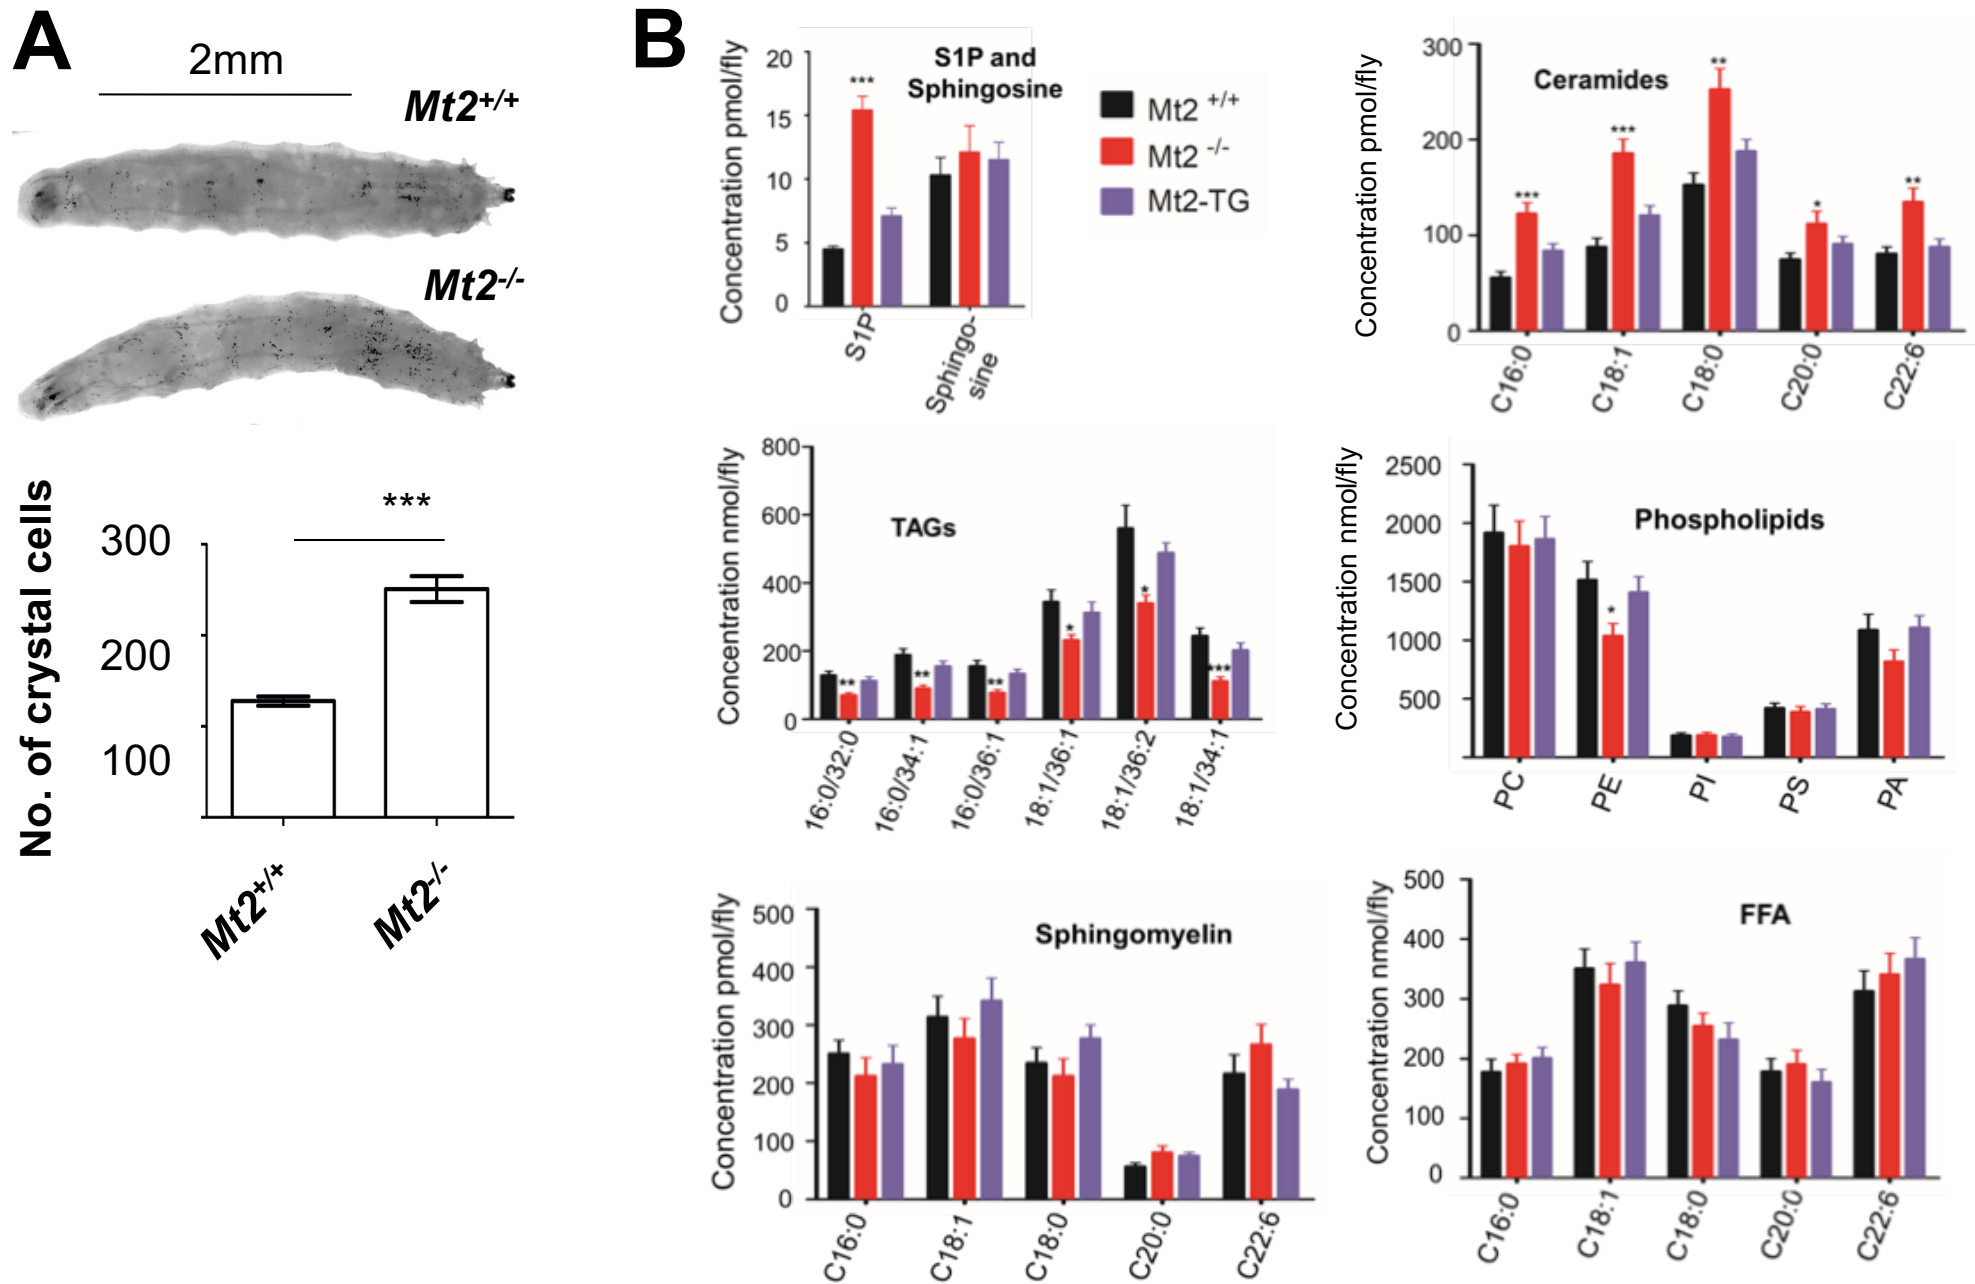

**A.** Crystal cell numbers are ~2-fold higher in *Mt2*<sup>-/-</sup> larvae when compared to *Mt2*<sup>+/+</sup> suggesting a role for Mt2 in regulating larval hematopoiesis. Crystal cells were counted in three abdominal segments. N=3, n=4. This is the earliest phenotype seen in *Mt2*<sup>-/-</sup> flies.

**B.** Quantitative lipidomics measuring changes in lipid moieties in 15 day old *Mt2*<sup>+/+</sup>, *Mt2*<sup>-/-</sup> and *Mt2*-TG flies. Sphingomyelin, Sphingosine, Free fatty acids and overall phospholipid levels do not change significantly while S1P, Ceramides and TAGs show significant changes. 1Way ANOVA followed by tukey test was performed. N=5.
